# Supplementary material for: Effect of continuum-of-care intervention package on improving contacts and quality of maternal and newborn healthcare in Ghana: a cluster randomised controlled trial
Source: PubMed Central journal article supplement — BMJ Open. 2019 Sep 11;9(9):e025347. doi: 10.1136/bmjopen-2018-025347 (PMC6738678; doi:10.1136/bmjopen-2018-025347), 2019-09-11
Supplement: bmjopen-2018-025347.draft_revisions.pdf [file bmjopen-2018-025347.draft_revisions.pdf]

# BMJ Open

BMJ Open is committed to open peer review. As part of this commitment we make the peer review history of every article we publish publicly available.

When an article is published we post the peer reviewers' comments and the authors' responses online. We also post the versions of the paper that were used during peer review. These are the versions that the peer review comments apply to.

The versions of the paper that follow are the versions that were submitted during the peer review process. They are not the versions of record or the final published versions. They should not be cited or distributed as the published version of this manuscript.

BMJ Open is an open access journal and the full, final, typeset and author-corrected version of record of the manuscript is available on our site with no access controls, subscription charges or pay-per-view fees (<http://bmjopen.bmj.com>).

If you have any questions on BMJ Open's open peer review process please email [info.bmjopen@bmj.com](mailto:info.bmjopen@bmj.com)

# BMJ Open

## Effect of continuum-of-care intervention package on improving contacts and quality of maternal and newborn health care in Ghana: a cluster randomized controlled trial

|                               |                                                                                                                                                                                                                                                                                                                                                                                                                                                                                                                                                                                                                                                                                                                                                                                                                                                                                                                                                                                                                                                                                                                                                                                                                                                                                                                                                                                                                                                                                                                                                                                                                                                                                                                                                                                                                                                                                                                                            |
|-------------------------------|--------------------------------------------------------------------------------------------------------------------------------------------------------------------------------------------------------------------------------------------------------------------------------------------------------------------------------------------------------------------------------------------------------------------------------------------------------------------------------------------------------------------------------------------------------------------------------------------------------------------------------------------------------------------------------------------------------------------------------------------------------------------------------------------------------------------------------------------------------------------------------------------------------------------------------------------------------------------------------------------------------------------------------------------------------------------------------------------------------------------------------------------------------------------------------------------------------------------------------------------------------------------------------------------------------------------------------------------------------------------------------------------------------------------------------------------------------------------------------------------------------------------------------------------------------------------------------------------------------------------------------------------------------------------------------------------------------------------------------------------------------------------------------------------------------------------------------------------------------------------------------------------------------------------------------------------|
| Journal:                      | <i>BMJ Open</i>                                                                                                                                                                                                                                                                                                                                                                                                                                                                                                                                                                                                                                                                                                                                                                                                                                                                                                                                                                                                                                                                                                                                                                                                                                                                                                                                                                                                                                                                                                                                                                                                                                                                                                                                                                                                                                                                                                                            |
| Manuscript ID                 | bmjopen-2018-025347                                                                                                                                                                                                                                                                                                                                                                                                                                                                                                                                                                                                                                                                                                                                                                                                                                                                                                                                                                                                                                                                                                                                                                                                                                                                                                                                                                                                                                                                                                                                                                                                                                                                                                                                                                                                                                                                                                                        |
| Article Type:                 | Research                                                                                                                                                                                                                                                                                                                                                                                                                                                                                                                                                                                                                                                                                                                                                                                                                                                                                                                                                                                                                                                                                                                                                                                                                                                                                                                                                                                                                                                                                                                                                                                                                                                                                                                                                                                                                                                                                                                                   |
| Date Submitted by the Author: | 11-Jul-2018                                                                                                                                                                                                                                                                                                                                                                                                                                                                                                                                                                                                                                                                                                                                                                                                                                                                                                                                                                                                                                                                                                                                                                                                                                                                                                                                                                                                                                                                                                                                                                                                                                                                                                                                                                                                                                                                                                                                |
| Complete List of Authors:     | <p>Okawa, Sumiyo; Graduate School of Medicine, the University of Tokyo, Department of Community and Global Health</p> <p>Gyapong, Margaret; Dodowa Health Research Centre; University of Health &amp; Allied Sciences, Institute of Health Research</p> <p>Leslie, Hannah; Harvard T. H. Chan School of Public Health, Global Health and Population</p> <p>Shibanuma, Akira; Graduate School of Medicine, the University of Tokyo, Department of Community and Global Health</p> <p>Kikuchi, Kimiyo; Kyushu University, Institute of Decision Science for a Sustainable Society; Graduate School of Medicine, The University of Tokyo, Department of Community and Global Health</p> <p>Yeji, Francis; Navrongo Health Research Centre</p> <p>Tawiah, Charlotte; Kintampo Health Research Centre</p> <p>Addei, Sheila; Dodowa Health Research Centre</p> <p>Nanishi, Keiko; Graduate School of Medicine and Faculty of Medicine, The University of Tokyo, Office of International Academic Affairs; Graduate School of Medicine, The University of Tokyo, Department of Community and Global Health</p> <p>Oduro, Abraham; Navrongo Health Research Centre, Epidemiology</p> <p>Owusu-Agyei, Seth; Kintampo Health Research Centre</p> <p>Ansah, Evelyn; Ghana Health Service, Research and Development Division; University of Health &amp; Allied Sciences, Institute of Health Research</p> <p>Asare, Gloria; Ghana Health Service Headquarters</p> <p>Yasuoka, Junko; Graduate School of Medicine, the University of Tokyo, Department of Community and Global Health; Tokyo University of Agriculture and Technology, Research and Education Center for Prevention of Global Infectious Diseases of Animals</p> <p>Hodgson, Abraham; Ghana Health Service Headquarters, Research and Development Division</p> <p>Jimba, Masamine; Graduate School of Medicine, The University of Tokyo, Department of Community and Global Health</p> |
| Keywords:                     | Quality in health care < HEALTH SERVICES ADMINISTRATION & MANAGEMENT, Maternal medicine < OBSTETRICS, Community child health < PAEDIATRICS                                                                                                                                                                                                                                                                                                                                                                                                                                                                                                                                                                                                                                                                                                                                                                                                                                                                                                                                                                                                                                                                                                                                                                                                                                                                                                                                                                                                                                                                                                                                                                                                                                                                                                                                                                                                 |
|                               |                                                                                                                                                                                                                                                                                                                                                                                                                                                                                                                                                                                                                                                                                                                                                                                                                                                                                                                                                                                                                                                                                                                                                                                                                                                                                                                                                                                                                                                                                                                                                                                                                                                                                                                                                                                                                                                                                                                                            |

1  
2  
3  
4  
5  
6  
7  
8  
9  
10  
11  
12  
13  
14  
15  
16  
17  
18  
19  
20  
21  
22  
23  
24  
25  
26  
27  
28  
29  
30  
31  
32  
33  
34  
35  
36  
37  
38  
39  
40  
41  
42  
43  
44  
45  
46  
47  
48  
49  
50  
51  
52  
53  
54  
55  
56  
57  
58  
59  
60

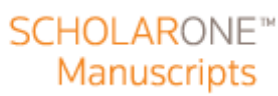

1  
2  
3  
4  
5 **Effect of continuum-of-care intervention package on improving contacts and**  
6 **quality of maternal and newborn health care in Ghana: a cluster randomized**  
7 **controlled trial**  
8  
9

10  
11 Sumiyo Okawa<sup>1</sup>, Margaret Gyapong<sup>2,3</sup>, Hannah H Leslie<sup>4</sup>, Akira Shibamura<sup>1</sup>, Kimiyo Kikuchi<sup>1,5</sup>,  
12 Francis Yeji<sup>6</sup>, Charlotte Tawiah<sup>7</sup>, Sheila Addei<sup>2</sup>, Keiko Nanishi<sup>1,8</sup>, Abraham Rexford Oduro<sup>6</sup>,  
13 Seth Owusu-Agyei<sup>7</sup>, Evelyn Korkor Ansah<sup>3,9</sup>, Gloria Quansah Asare<sup>9</sup>, Junko Yasuoka<sup>1,10</sup>,  
14 Abraham Hodgson<sup>9</sup>, Masamine Jimba<sup>1\*</sup>, and the Ghana EMBRACE Implementation Research  
15 Project Team  
16  
17  
18  
19  
20  
21  
22

23  
24 **Author affiliations**  
25

26 <sup>1</sup> Department of Community and Global Health, Graduate School of Medicine, The University  
27 of Tokyo, 7-3-1 Hongo, Bunkyo-ku, Tokyo Japan  
28

29 <sup>2</sup> Dodowa Health Research Centre, P.O. Box DD1, Dodowa, Greater Accra, Ghana  
30

31 <sup>3</sup> Institute of Health Research, University of Health & Allied Sciences, Ho, Ghana  
32

33 <sup>4</sup> Harvard T.H. Chan School of Public Health, Boston, USA  
34

35 <sup>5</sup> Institute of Decision Science for a Sustainable Society, Kyushu University, Fukuoka, Japan  
36

37 <sup>6</sup> Navrongo Health Research Centre, P.O. Box 114, Navrongo, Upper-East, Ghana  
38

39 <sup>7</sup> Kintampo Health Research Centre, P.O. Box 200, Kintampo, Brong-Ahafo, Ghana  
40

41 <sup>8</sup> Office of International Academic Affairs, Graduate School of Medicine and Faculty of  
42 Medicine, The University of Tokyo, Tokyo, Japan  
43

44 <sup>9</sup> Ghana Health Service Headquarters, Accra, Ghana  
45

46 <sup>10</sup> Research and Education Center for Prevention of Global Infectious Diseases of Animals,  
47 Tokyo University of Agriculture and Technology  
48  
49

50  
51  
52  
53  
54 **\*Corresponding author**  
55  
56  
57  
58  
59  
60

1  
2  
3  
4  
5  
6  
7  
8  
9  
10  
11  
12  
13  
14  
15  
16  
17  
18  
19  
20  
21  
22  
23  
24  
25  
26  
27  
28  
29  
30  
31  
32  
33  
34  
35  
36  
37  
38  
39  
40  
41  
42  
43  
44  
45  
46  
47  
48  
49  
50  
51  
52  
53  
54  
55  
56  
57  
58  
59  
60

Masamine Jimba

Postal address: 7-3-1, Hongo, Bunkyo-ku, Tokyo, 113-0033, Japan

Email: [mjimba@m.u-tokyo.ac.jp](mailto:mjimba@m.u-tokyo.ac.jp)

Telephone number: +81-338122111

**Word count:** 3676

For peer review only

## ABSTRACT

**Objective:** To evaluate the effect of a continuum-of-care intervention package on the quality of care during the contacts of women and newborns with health-care providers.

**Design:** A cluster randomized controlled trial.

**Setting:** 32 sub-districts in 3 rural sites in Ghana.

**Participants:** Women who delivered during the trial period were eligible for participating in the trial. The baseline survey involved 1,480 women who delivered before the intervention, and the follow-up survey involved 1,490 women who received maternal and newborn care during the trial.

**Interventions:** The intervention package included: training health-care providers, utilizing an educational and recording tool named “continuum-of-care card”, providing the first postnatal care (PNC) by retaining women and newborns at health-care facility or home visit by health-care providers.

**Outcome measures:** Adequate contacts were defined as at least 4 contacts during pregnancy, delivery with assistance of skilled health-care providers at a health-care facility, and 3 timely contacts within 6 weeks postpartum. High-quality care was defined as receiving 6 care items for antenatal care (ANC), 3 for peripartum care (PPC), and 14 for PNC.

**Results:** The difference-in-difference (DiD) estimators of having adequate contacts with high-quality care were 2.7 ( $p=0.54$ ) at ANC, 2.0 ( $p=0.73$ ) at PPC, and 12.7 ( $p=0.14$ ) at PNC in the intention-to-treat design. In the per-protocol design that assigned the study sample by possession of the continuum-of-care card, the DiD estimators were 3.2 ( $p=0.52$ ) at ANC, 7.4 ( $p=0.27$ ) at PPC, and 20.7 ( $p=0.01$ ) at PNC. Residential site and national health insurance membership were associated with adequate contacts with high-quality care in the intervention group in the follow-up survey.

1  
2  
3  
4  
5 **Conclusions:** The interventions increased contacts with health-care providers and quality of  
6 care during PNC. However, a large gap remains between contacts and quality-adjusted contacts.  
7  
8 Maternal and newborn care in Ghana needs to improve its continuity and quality.  
9

10 **Trial registration number:** (90618993)  
11  
12  
13  
14

### 15 **Strengths and Limitations**

- 16  
17 • This was a cluster randomized controlled trial conducted in three rural sites which had  
18 diverse ecological characteristics and operated the Health and Demographic Surveillance  
19 System.  
20  
21
- 22  
23 • This study assessed the effect of intervention on the process dimension of quality-of-care in  
24 antenatal, peripartum, and postnatal care accordingly, although the measurements were not  
25 standardized.  
26  
27
- 28  
29 • The study results could be affected by uneven cluster allocation and the implementation in  
30 intention-to-treat design.  
31  
32
- 33  
34 • However, our analysis showed that regular contacts with health-care providers did not  
35 guarantee quality of care, which suggests that maternal and newborn care program needs to  
36 improve continuity and quality of care.  
37  
38  
39  
40  
41  
42  
43  
44  
45  
46  
47  
48  
49  
50  
51  
52  
53  
54  
55  
56  
57  
58  
59  
60

## INTRODUCTION

Maternal and newborn health has significantly improved during the Millennium Development Goals era. Women and newborns still encounter a life-threatening risk from the third trimester to the first month postpartum in resource limited countries.<sup>1,2</sup> A key strategy to maintain maternal and neonatal health throughout the high risk period is to provide effective interventions continuously during the high-risk period,<sup>3</sup> namely Continuum of Care (CoC). However, CoC remains a critical challenge in many countries. In our previous study, for example, only 8% of women completed CoC from pregnancy to postpartum period.<sup>4</sup> Moreover, regular contacts with health-care providers alone would not improve maternal and newborn health outcomes if they did not receive quality care.<sup>5</sup>

Currently, maternal and newborn health research provides no comprehensive definition and measurements of quality of care.<sup>6</sup> In 1988, Donabedian suggested a framework for quality of care assessment.<sup>7</sup> In the framework, quality of care is assessed with 3 dimensions: structure, process, and outcomes.<sup>7</sup> Using this framework, existing literature measured quality of care by creating composite indexes of structure and/or process of care,<sup>8-11</sup> and identified remarkable gaps between contacts with health-care providers and actual quality of care during the contacts.<sup>9,10,12,13</sup> In addition, previous studies evaluated the effects of interventions on improving process of care (e.g., receiving iron tablets, tetanus toxoid injections, HIV testing, intermittent preventive treatment for malaria, or basic newborn care).<sup>14-16</sup> However, to our best knowledge, few intervention studies have evaluated the effects on both contacts with health-care providers and quality of care from pregnancy to the postpartum period.

Ghana is one of the sub-Saharan African countries with an estimated maternal mortality ratio of 380/100,000 live births in 2013.<sup>17</sup> Neonatal mortality rate was 29/1,000 live births in 2010-2014, with a minor decline in the last decade.<sup>18</sup> The government of Ghana introduced health policies to mitigate the financial and geographical constraints affecting the access to health-care services: community-based health planning and services (CHPS) initiative in 1999,<sup>19</sup>



1  
2  
3  
4  
5 and national health insurance scheme in 2004.<sup>20</sup> However, maternal and newborn health remains  
6  
7 a high-priority challenge, and further effort is needed to strengthen the continuum of care and  
8  
9 improve the quality of care under the implementation of these policies.

10  
11 Ghana's Ensure Mothers and Babies Regular Access to Care (EMBRACE)  
12  
13 implementation research aimed to strengthen CoC.<sup>21</sup> The major activities included the  
14  
15 development and implementation of an intervention package and evaluation of its effect on CoC.  
16  
17 Based on the findings of formative research,<sup>4</sup> we developed an intervention package to ensure  
18  
19 CoC with health-care providers during ANC, peripartum care (PPC), and PNC. Although CoC  
20  
21 is the primary outcome for the impact evaluation,<sup>22</sup> quality of care during the regular contacts is  
22  
23 another important outcome for the process evaluation, which provides multifaceted implications  
24  
25 for maternal and newborn health program. Therefore, this study aimed to examine the effect of  
26  
27 an intervention package on both contacts with health-care providers and quality of care, to  
28  
29 identify the gaps between adequate contacts and quality-adjusted adequate contacts, and to  
30  
31 determine the factors associated with having adequate contacts with high-quality care among  
32  
33 women in the intervention group.

## 34 35 **METHODS**

### 36 37 **Study design and setting**

38  
39 This was a cluster randomized controlled trial using the effectiveness-implementation hybrid  
40  
41 design registered in ISRCTN (90618993).<sup>22</sup> We targeted 3 rural sites in Ghana: Navrongo  
42  
43 (northern), Kintampo (central), and Dodowa (southern). Ghana Health Service had Health  
44  
45 Research Centers (HRCs) in the 3 sites, and these HRCs operated the Health and Demographic  
46  
47 Surveillance System.

48  
49 Each site covered 2 districts and consisted of 36 sub-districts. We included 32 sub-  
50  
51 districts in this study (Navrongo, 12; Kintampo, 12; and Dodowa, 8) and excluded 4 sub-  
52  
53 districts because of other projects implemented or planned during our intervention period. We  
54  
55  
56  
57  
58  
59  
60

1  
2  
3  
4  
5 used sub-district as a cluster unit as it was the primary unit of the health system. In the pre-  
6 intervention facility assessment, the percentage of health-care facilities with at least one  
7 midwife was 47% in Navrongo, 36% in Dodowa, and 21% in Kintampo.  
8  
9

10 We created 16 pairs from the 32 clusters, taking into account the population, the volume  
11 of delivery, and the number of midwife per cluster. A data analyst who was not a member of the  
12 study team randomly allocated the paired clusters using computer-generated random sequences.  
13 However, we assigned 3 sub-districts with a district hospital to the intervention group as  
14 majority of the childbirths took place in the hospitals. We informed about the implementation of  
15 the intervention to the community people and health-care providers in the intervention group  
16 only. However, complete blinding was not feasible; we implemented the intervention in the  
17 intention-to-treat design, which did not control for women's choice and access to health-care  
18 facilities across a cluster boundary.  
19  
20  
21  
22  
23  
24  
25  
26  
27

### 28 **Participants and intervention**

29 Women who were aged between 15 – 49 years old, and delivered between October 1, 2014 and  
30 September 30, 2015 in the intervention group were eligible for study enrolment.<sup>22</sup>  
31  
32

33 We implemented the intervention for 12 months (October 1, 2014 to September 30,  
34 2015). The details of the intervention were described previously.<sup>22</sup> Women were enrolled to the  
35 intervention when they had contacts with health-care providers anytime from pregnancy to the  
36 postpartum period.  
37  
38  
39  
40  
41

42 The intervention package was composed of 4 interventions. First, health-care providers  
43 underwent reorientation about CoC. Second, health-care providers distributed the CoC card to  
44 women, which contains the schedule and actual dates of contacts with health-care providers,  
45 information on essential care and birth preparedness, and the presence of danger signs. Health-  
46 care providers and women utilized the CoC card in every contact. Third, health-care providers  
47 retained women and their newborns in the health-care facility for the first 24 hours postpartum  
48 to provide the first postnatal care. Fourth, health-care providers made home visits to provide  
49  
50  
51  
52  
53  
54  
55  
56  
57  
58  
59  
60

1  
2  
3  
4  
5 postnatal care to women and their newborns within the first 48 hours if they missed the first  
6  
7 postnatal contact by 24 hours postpartum.

8  
9 We emphasized to implement the intervention using the existing health system and  
10 resource; all intervention facilities in the 3 sites had re-orientation of health-care providers, and  
11 implemented all or a part of the intervention package depending on availability of resource and  
12 infrastructure. In addition, district health management teams conducted monthly supervision in  
13 health-care facilities, monitored the performance of the interventions, and had a monthly  
14 meeting to report the progress and discuss the challenges in collaboration with research teams.  
15  
16 In the control group, women and their newborns received the standard care.  
17  
18  
19  
20  
21

## 22 **Survey**

23  
24 We conducted the baseline survey from July to September 2014, with a sample of 1,500 women  
25 who delivered between September 1, 2012 and June 30, 2014, and the follow-up survey was  
26 performed from October to December 2015, with a sample of 1,500 women who received care  
27 during the intervention period. We calculated the required sample size based on an expected  
28 increase in antenatal contacts from 86.6 to 95.0% according to the finding of our formative  
29 study.<sup>4</sup> We considered a 95% confidence interval, 80% power, an intraclass correlation  
30 coefficient of 0.02675, and 10% attrition in the sample size calculation.<sup>22</sup> We performed two-  
31 stage random sampling to select 500 eligible women from each study site for the baseline and  
32 follow-up surveys accordingly.  
33  
34  
35  
36  
37  
38  
39  
40  
41  
42

43 For the first stage, we defined sub-districts as a cluster unit. A sub-district is composed  
44 of several administrative community units. We used the administrative community units as a  
45 primary sampling unit, and randomly selected primary sampling units from each sub-districts  
46 that corresponds to the probability proportionate to the population. For the second stage, we  
47 randomly selected 10 women per primary sampling unit.  
48  
49  
50  
51

52 Trained research assistants performed the survey by visiting the households of the  
53 eligible women and conducting face-to-face interviews with women who had no knowledge  
54  
55  
56  
57  
58  
59

1  
2  
3  
4  
5 about the cluster allocation. The structured questionnaire included women's socio-demographic  
6 characteristics; frequency and timing of contacts with health-care providers; contents of care  
7 that women and their newborn received during ANC, PPC, and PNC; and whether they received  
8 the CoC card. The frequency and timing of contacts and contents of care corresponded to the  
9 recommendation of the Ghana National Safe Motherhood Service Protocol.<sup>23</sup>  
10  
11  
12  
13

### 14 15 **Main outcome measures**

16  
17 We defined adequate contacts based on the frequency and timing of contacts with  
18 health-care providers as follows: at least 4 contacts with health-care providers during pregnancy,  
19 delivery with assistance of skilled health-care providers at a health-care facility, and 3 contacts  
20 with health-care providers within 48 hours, at 1 week (3-10 days), and at 6 weeks (36-48 days)  
21 postpartum (Table 1).  
22  
23  
24  
25

26  
27 We measured the quality of care based on the contents of care received by the women  
28 and their newborns during ANC, PPC, and PNC (Table 1). The process-of-care dimension in  
29 Donabedian's framework was employed.<sup>7</sup> We created quality of care indexes that consisted of 6  
30 care items for ANC, 3 for PPC, and 14 for PNC. High-quality care was defined as receiving all  
31 care items during ANC, PPC, and PNC.  
32  
33  
34  
35

36  
37 Having adequate contacts with health-care providers and high-quality care was  
38 considered the primary outcome, and the variable was composed of 3 categories: inadequate  
39 contacts regardless of care quality, adequate contacts with low-quality care, and adequate  
40 contacts with high-quality care. (i.e., quality-adjusted adequate contacts).  
41  
42  
43  
44  
45  
46  
47  
48  
49  
50  
51  
52  
53  
54  
55  
56  
57  
58  
59  
60

Table 1 Definitions of the study outcome

| Stage                 | Contacts with health-care providers                                                             | Contents of care                                                                                                                                                                                                                                                                                                                                                                                                                                                                           | Primary outcome                                                                                                                                                                                                                                                                        |
|-----------------------|-------------------------------------------------------------------------------------------------|--------------------------------------------------------------------------------------------------------------------------------------------------------------------------------------------------------------------------------------------------------------------------------------------------------------------------------------------------------------------------------------------------------------------------------------------------------------------------------------------|----------------------------------------------------------------------------------------------------------------------------------------------------------------------------------------------------------------------------------------------------------------------------------------|
| Antenatal care (ANC)  | At least 4 contacts                                                                             | 6 care items:<br>(1) HIV test<br>(2) Hemoglobin test $\geq 2$<br>(3) Tetanus toxoid vaccination $\geq 2$<br>(4) Intermittent preventive treatment for malaria $\geq 3$<br>(5) Blood group and Rhesus factor test<br>(6) Blood pressure assessment $\geq 4$                                                                                                                                                                                                                                 | (i) Inadequate contacts: $\leq 3$ contacts<br>(ii) Adequate contacts with low quality: $\geq 4$ contacts with $\leq 5$ care items<br>(iii) Adequate contacts with high quality (i.e., quality-adjusted adequate contacts): $\geq 4$ contacts with 6 care items                         |
| Peripartum care (PPC) | Skilled facility-based delivery (SFD)                                                           | 3 care items:<br>(1) Dried newborn's body<br>(2) Skin-to-skin contact<br>(3) Initiation of breastfeeding $\leq 30$ minutes                                                                                                                                                                                                                                                                                                                                                                 | (i) Inadequate contact: Non-SFD<br>(ii) Adequate contact with low quality: SFD with $\leq 2$ care items<br>(iii) Adequate contact with high quality (i.e., quality-adjusted adequate contact): SFD with 3 care items                                                                   |
| Postnatal care (PNC)  | 3 contacts with timeliness:<br>First: $\leq 48$ hours<br>Second: 3-10 days<br>Third: 36-48 days | 14 care items:<br>Mother:<br>(1) Temperature measurement<br>(2) Blood pressure assessment<br>(3) Bleeding check<br>(4) Breastfeeding problem check<br>(5) Hemoglobin assessment<br>(6) Fundal height assessment<br>(7) Perineum/Lochia check<br>(8) Vitamin A supplement;<br>Newborn:<br>(9) General physical examination<br>(10) BCG immunization<br>(11) OPV immunization<br>(12) Umbilical cord bleeding check<br>(13) Temperature measurement<br>(14) Breastfeeding difficulties check | (i) Inadequate contact: $\leq 2$ contacts or non-timely contacts<br>(ii) Adequate contacts with low quality: 3 timely contacts with $\leq 13$ care items<br>(iii) Adequate contacts with high quality (i.e., quality-adjusted adequate contacts): 3 timely contacts with 14 care items |

### **Participants and Public involvement**

Participants and public were not involved in the design of, the recruitment to, and conduct of the study because this was a randomized controlled trial. However, community people in the intervention group were announced about the EMBRACE project at the commencement of the trial.

### **Statistical analysis**

We calculated the distributions of the basic characteristics of the women, the percentage of care items received by women and their newborns, and the proportions of adequate contacts with high quality care. We evaluated the effect of the intervention on receiving single-care items and having adequate contacts with high-quality care during ANC, PPC, and PNC. However, the effect of the intervention could be biased because of imbalanced cluster allocation; the effect could appear greater as 3 clusters with district hospitals were assigned to the intervention group. Moreover, women in the control group could access district hospitals in the intervention group, which in turn leads to a potential contamination that could make the effect of the intervention smaller. Thus, to control for these potential biases, we utilized difference-in-difference (DiD) analyses with 4 groups including the intervention (n=863) and control (n=617) groups in the baseline survey and the intervention (n=870) and control (n=602) groups in the follow-up survey. The DiD analyses adjusted a potential confounder of living in a cluster with a district hospital, and the effect of cluster correlations using robust variance estimates.

Furthermore, we evaluated the study outcome in the intention-to-treat and per-protocol designs. The intention-to-treat design focuses whether the intervention works in the real world setting, which shows effectiveness of the intervention.<sup>24</sup> Thus, we assigned the sample that corresponded to the initial cluster allocation, which results could be affected by coverage and contamination of the intervention. The per-protocol design focuses whether the intervention works in the ideal setting, which shows efficacious of the intervention.<sup>24</sup> Thus, we assigned the sample according to the possession of the CoC card in lieu of the actual enrolment to the

1  
2  
3  
4  
5 intervention group; we excluded 238 women in the intervention group who did not receive a  
6  
7 CoC card, and 134 women in the control group who received a CoC card.

8  
9 Finally, we performed logistic regression analysis to identify characteristics of women  
10  
11 in the intervention group who had a greater chance of having adequate contacts with high-  
12  
13 quality care using the follow-up survey data (n=870). The independent variables included study  
14  
15 site, living in a sub-district with a district hospital, national health insurance membership,  
16  
17 wealth quintiles according to the possession of the household assets, and parity. We employed  
18  
19 robust variance estimate to control for potential correlations within clusters. We used Stata 13  
20  
21 (College Station, TX: Stata Corp LP) for the analyses.

### 22 23 **Ethical approval**

24  
25 We obtained ethical approvals from Ghana Health Service, Navrongo HRC, Kintampo HRC,  
26  
27 Dodowa HRC, and The University of Tokyo. Consent was obtained from the local health  
28  
29 authorities and community leaders prior to conducting the intervention study. We obtained oral  
30  
31 informed consent from participants of the intervention, whereas we obtained written informed  
32  
33 consent from participants of the surveys. For those who were aged under 18, we requested  
34  
35 permission from their guardians and obtained their signature on the consent form.

### 36 37 38 **RESULTS**

39  
40 We analyzed the baseline survey data of 1,480 women and the follow-up survey data of 1,490  
41  
42 women. In the baseline survey, 617 (41.7%) were sampled from the control group, and 863  
43  
44 (58.3%) were sampled from the intervention group. In the follow-up survey, 620 (41.6%) were  
45  
46 sampled from the control group, and 870 (58.4%) were sampled from the intervention group. In  
47  
48 addition, we excluded the data of 10 women in one primary sampling unit from the baseline and  
49  
50 follow-up survey datasets accordingly, because it did not have 10 eligible women during the  
51  
52 follow-up survey.

Table 2 shows the distributions of the basic characteristics of the women. The intervention group had more Muslim and wealthy women than the control group.

Table 2 Basic characteristics of women (n=2970)

|                                  | Baseline<br>(n=1,480) |        |                         |        | <i>p</i> | Follow-up<br>(n=1,490) |        |                         |        | <i>p</i> |
|----------------------------------|-----------------------|--------|-------------------------|--------|----------|------------------------|--------|-------------------------|--------|----------|
|                                  | Control<br>(n=617)    |        | Intervention<br>(n=863) |        |          | Control<br>(n=620)     |        | Intervention<br>(n=870) |        |          |
|                                  | n                     | (%)    | n                       | (%)    |          | n                      | (%)    | n                       | (%)    |          |
| <b>Study site</b>                |                       |        |                         |        |          |                        |        |                         |        |          |
| Navrongo                         | 220                   | (35.7) | 280                     | (32.4) | 0.43     | 220                    | (35.5) | 280                     | (32.2) | 0.40     |
| Kintampo                         | 198                   | (32.1) | 288                     | (33.4) |          | 200                    | (32.3) | 290                     | (33.3) |          |
| Dodowa                           | 199                   | (32.3) | 295                     | (34.2) |          | 200                    | (32.3) | 300                     | (34.5) |          |
| <b>Age</b>                       |                       |        |                         |        |          |                        |        |                         |        |          |
| ≤19                              | 35                    | (5.7)  | 53                      | (6.1)  | 0.83     | 92                     | (14.8) | 130                     | (14.9) | 0.93     |
| 20-34                            | 452                   | (73.3) | 638                     | (73.9) |          | 439                    | (70.8) | 621                     | (71.4) |          |
| 35-49                            | 130                   | (21.1) | 172                     | (19.9) |          | 89                     | (14.4) | 119                     | (13.7) |          |
| <b>Education</b>                 |                       |        |                         |        |          |                        |        |                         |        |          |
| Did not complete primary         | 178                   | (28.9) | 257                     | (29.8) | 0.77     | 145                    | (23.4) | 182                     | (20.9) | 0.12     |
| Completed primary                | 170                   | (27.6) | 222                     | (25.7) |          | 196                    | (31.6) | 242                     | (27.8) |          |
| Completed secondary              | 209                   | (33.9) | 289                     | (33.5) |          | 207                    | (33.4) | 326                     | (37.5) |          |
| Complete tertiary                | 60                    | (9.7)  | 95                      | (11.0) |          | 72                     | (11.6) | 120                     | (13.8) |          |
| <b>Marital status</b>            |                       |        |                         |        |          |                        |        |                         |        |          |
| Married                          | 415                   | (67.3) | 542                     | (62.8) | 0.12     | 351                    | (56.6) | 470                     | (54.0) | 0.32     |
| Cohabiting                       | 150                   | (24.3) | 224                     | (26.0) |          | 163                    | (26.3) | 260                     | (29.9) |          |
| Other                            | 52                    | (8.4)  | 97                      | (11.2) |          | 106                    | (17.1) | 140                     | (16.1) |          |
| <b>Parity</b>                    |                       |        |                         |        |          |                        |        |                         |        |          |
| Once                             | 128                   | (20.8) | 196                     | (22.7) | 0.37     | 187                    | (30.2) | 299                     | (34.4) | 0.09     |
| Twice or more                    | 489                   | (79.3) | 667                     | (77.3) |          | 433                    | (69.8) | 571                     | (65.6) |          |
| <b>Religion</b>                  |                       |        |                         |        |          |                        |        |                         |        |          |
| Christian                        | 524                   | (84.9) | 656                     | (76.0) | <0.01    | 533                    | (86.0) | 682                     | (78.4) | <0.01    |
| Muslim                           | 51                    | (8.3)  | 150                     | (17.4) |          | 65                     | (10.5) | 145                     | (16.7) |          |
| Others                           | 42                    | (6.8)  | 57                      | (6.6)  |          | 22                     | (3.6)  | 43                      | (4.9)  |          |
| <b>Wealth quintiles</b>          |                       |        |                         |        |          |                        |        |                         |        |          |
| Lowest                           | 144                   | (23.3) | 156                     | (18.1) | <0.01    | 171                    | (27.6) | 188                     | (21.6) | <0.01    |
| Lower                            | 141                   | (22.9) | 155                     | (18.0) |          | 132                    | (21.3) | 112                     | (12.9) |          |
| Middle                           | 104                   | (16.9) | 196                     | (22.7) |          | 118                    | (19.0) | 174                     | (20.0) |          |
| Higher                           | 120                   | (19.5) | 169                     | (19.6) |          | 106                    | (17.1) | 192                     | (22.1) |          |
| Highest                          | 108                   | (17.5) | 187                     | (21.7) |          | 93                     | (15.0) | 204                     | (23.5) |          |
| <b>National health insurance</b> |                       |        |                         |        |          |                        |        |                         |        |          |



|             |            |            |      |            |            |      |
|-------------|------------|------------|------|------------|------------|------|
| Covered     | 344 (55.8) | 510 (59.1) | 0.21 | 407 (65.7) | 611 (70.2) | 0.06 |
| Not covered | 272 (44.2) | 353 (40.9) |      | 213 (34.4) | 259 (29.8) |      |

*p*, *p*-value for chi-squared test.

Table 3 shows the contents of care received by the women and their newborns during ANC, PPC, and PNC. After the intervention, 12.6% of women in the intervention group received all 6 items during ANC, 33.6% received all 3 items during PPC, and 41.5% of women and their newborns received all 14 items during PNC with no significant difference in DiD analysis. Among the 4 ANC care items which reception were recorded in the CoC card, blood group testing was significantly increased to 79.5% in the intervention group. For other care items, the percentage remained low even after the intervention: hemoglobin tests (40.9%), intermittent preventive treatment for malaria (43.7%), and tetanus toxoid vaccination (46.4%). During the peripartum period, only 47.0% initiated breastfeeding within the first 30 minutes. During PNC, over 60% of women and their newborns received each care item.

Table 3 Content of ANC, PPC, and PNC (n=2,970)

|                                                       | Baseline           |        |                         |        | Follow-up          |        |                         |        | DiD <sup>†</sup> | <i>p</i> |
|-------------------------------------------------------|--------------------|--------|-------------------------|--------|--------------------|--------|-------------------------|--------|------------------|----------|
|                                                       | Control<br>(n=617) |        | Intervention<br>(n=863) |        | Control<br>(n=620) |        | Intervention<br>(n=870) |        |                  |          |
|                                                       | n                  | (%)    | n                       | (%)    | n                  | (%)    | n                       | (%)    |                  |          |
| <b>ANC</b>                                            |                    |        |                         |        |                    |        |                         |        |                  |          |
| <b>All 6 care items received</b>                      | 35                 | (5.7)  | 42                      | (4.9)  | 66                 | (10.7) | 110                     | (12.6) | 2.7              | 0.54     |
| Blood group and Rhesus factor test                    | 326                | (52.8) | 431                     | (49.9) | 421                | (67.9) | 692                     | (79.5) |                  |          |
| HIV test                                              | 364                | (59.0) | 480                     | (55.6) | 494                | (79.7) | 675                     | (77.6) |                  |          |
| Blood pressure assessment 4 times                     | 341                | (55.3) | 444                     | (51.5) | 443                | (71.5) | 630                     | (72.4) |                  |          |
| Tetanus toxoid vaccination 2 doses                    | 252                | (40.8) | 339                     | (39.3) | 343                | (55.3) | 404                     | (46.4) |                  |          |
| Intermittent preventive treatment for malaria 3 doses | 249                | (40.4) | 313                     | (36.3) | 274                | (44.2) | 380                     | (43.7) |                  |          |
| Hemoglobin test 2 times                               | 178                | (28.9) | 228                     | (26.4) | 222                | (35.8) | 356                     | (40.9) |                  |          |
| <b>PPC</b>                                            |                    |        |                         |        |                    |        |                         |        |                  |          |
| <b>All 3 care items received</b>                      | 150                | (24.3) | 205                     | (23.8) | 197                | (31.8) | 292                     | (33.6) | 2.3              | 0.71     |
| Dried newborn's body                                  | 542                | (87.8) | 777                     | (90.0) | 584                | (94.2) | 812                     | (93.3) |                  |          |
| Skin-to-skin contact                                  | 295                | (47.8) | 396                     | (45.9) | 365                | (58.9) | 528                     | (60.7) |                  |          |

|                                               |     |        |     |        |     |        |     |        |      |      |
|-----------------------------------------------|-----|--------|-----|--------|-----|--------|-----|--------|------|------|
| Initiation of breastfeeding $\leq 30$ minutes | 277 | (44.9) | 336 | (38.9) | 287 | (46.3) | 409 | (47.0) |      |      |
| <b>PNC</b>                                    |     |        |     |        |     |        |     |        |      |      |
| <b>All 14 care items received</b>             | 63  | (10.2) | 99  | (11.5) | 197 | (31.8) | 361 | (41.5) | 8.4  | 0.36 |
| <b>Mother</b>                                 |     |        |     |        |     |        |     |        |      |      |
| All 8 maternal care items received            | 131 | (21.2) | 194 | (22.5) | 218 | (35.2) | 415 | (47.7) | 11.3 | 0.14 |
| Temperature measurement                       | 404 | (65.5) | 563 | (65.2) | 430 | (69.4) | 679 | (78.1) |      |      |
| Blood pressure assessment                     | 310 | (50.2) | 408 | (47.3) | 431 | (69.5) | 668 | (76.8) |      |      |
| Bleeding check                                | 325 | (52.7) | 505 | (58.5) | 429 | (69.2) | 638 | (73.3) |      |      |
| Breastfeeding problem check                   | 286 | (46.4) | 452 | (52.4) | 414 | (66.8) | 626 | (72.0) |      |      |
| Vitamin A supplement                          | 364 | (59.0) | 498 | (57.7) | 365 | (58.9) | 595 | (68.4) |      |      |
| Fundal height measurement                     | 306 | (49.6) | 443 | (51.3) | 341 | (55.0) | 559 | (64.3) |      |      |
| Perineum/lochia check                         | 293 | (47.5) | 461 | (53.4) | 357 | (57.6) | 550 | (63.2) |      |      |
| Hemoglobin assessment                         | 299 | (48.5) | 422 | (48.9) | 317 | (51.1) | 537 | (61.7) |      |      |
| <b>Newborns</b>                               |     |        |     |        |     |        |     |        |      |      |
| All 6 newborn care items received             | 81  | (13.1) | 175 | (20.3) | 326 | (52.6) | 506 | (58.2) | -1.6 | 0.87 |
| General physical examination                  | 443 | (71.8) | 595 | (69.0) | 464 | (74.8) | 678 | (77.9) |      |      |
| Temperature measurement                       | 99  | (16.1) | 214 | (24.8) | 442 | (71.3) | 661 | (76.0) |      |      |
| Breastfeeding difficulties check              | 293 | (47.5) | 492 | (57.0) | 440 | (71.0) | 642 | (73.8) |      |      |
| Umbilical cord bleeding check                 | 302 | (49.0) | 496 | (57.5) | 443 | (71.5) | 638 | (73.3) |      |      |
| OPV immunization                              | 412 | (66.8) | 519 | (60.1) | 412 | (66.5) | 595 | (68.4) |      |      |
| BCG immunization                              | 391 | (63.4) | 522 | (60.5) | 372 | (60.0) | 559 | (64.3) |      |      |

<sup>†</sup>Potential effect of cluster correlations was adjusted using robust variance estimates. Living in a cluster with district hospital was included in the model due to potential confounder.

DiD, difference-in-difference estimator; *p*, *p*-value for DiD estimators.

Table 4 shows the effect of the intervention on having adequate contacts with high-quality care. After the intervention, 12.6% of women in the intervention group had adequate contacts with high-quality care during ANC, with no significant effect in the intention-to-treat design (DiD=2.7, *p*=0.54) and per-protocol design (DiD=3.2, *p*=0.52). During PPC, 31.5% of women in the intervention group had adequate contacts with high-quality care, with no significant effect in the intention-to-treat design (DiD=2.0, *p*=0.73) and per-protocol design (DiD=7.4, *p*=0.27). During PNC, 33.7% of women in the intervention group had adequate contacts with high-quality care, with no significant effect in the intention-to-treat design

1  
2  
3  
4  
5 (DiD=12.7,  $p=0.14$ ), but with a significant effect in the per-protocol design (DiD=20.7,  $p=0.01$ ).  
6

7           Additionally, Table 4 shows the gap between adequate contacts (i.e., adequate contacts  
8 with high- or low-quality care) and quality-adjusted adequate contacts (i.e., adequate contacts  
9 with high-quality care). In the intention-to-treat design, 76.9% of women in the intervention  
10 group in the follow-up survey had adequate contacts during ANC; however, only 12.6% had  
11 quality-adjusted adequate contacts. Moreover, 82.0% delivered with the assistance of a skilled  
12 birth attendant at a health-care facility, while only 31.5% had a skilled delivery with high-  
13 quality care. During PNC, 62.2% of women had adequate contacts. However, only 33.7% had  
14 quality-adjusted adequate contacts.  
15  
16  
17  
18  
19  
20  
21  
22  
23  
24  
25  
26  
27  
28  
29  
30  
31  
32  
33  
34  
35  
36  
37  
38  
39  
40  
41  
42  
43  
44  
45  
46  
47  
48  
49  
50  
51  
52  
53  
54  
55  
56  
57  
58  
59  
60

Table 4 Effect of intervention on having adequate contacts with high-quality care

|                                     | Baseline<br>(n=1,480) |        | Follow-up: Intention to treat<br>(n=1,490) |        |                    |        | Follow up: Per protocol<br>(n=1,118) |        |                    |      | DiD | <i>p</i> |                         |        |      |      |
|-------------------------------------|-----------------------|--------|--------------------------------------------|--------|--------------------|--------|--------------------------------------|--------|--------------------|------|-----|----------|-------------------------|--------|------|------|
|                                     | Control<br>(n=617)    |        | Intervention<br>n=863                      |        | Control<br>(n=620) |        | Intervention<br>(n=870)              |        | Control<br>(n=486) |      |     |          | Intervention<br>(n=632) |        |      |      |
|                                     | n                     | (%)    | n                                          | (%)    | n                  | (%)    | n                                    | (%)    | n                  | (%)  |     |          | n                       | (%)    |      |      |
| <b>ANC</b>                          |                       |        |                                            |        |                    |        |                                      |        |                    |      |     |          |                         |        |      |      |
| Inadequate contacts                 | 202                   | (32.7) | 273                                        | (31.6) | 141                | (22.7) | 201                                  | (23.1) | -                  | -    | 115 | (23.7)   | 139                     | (22.0) | -    | -    |
| Adequate contacts with low quality  | 380                   | (61.6) | 548                                        | (63.5) | 413                | (66.6) | 559                                  | (64.3) | -                  | -    | 323 | (66.5)   | 411                     | (65.0) | -    | -    |
| Adequate contacts with high quality | 35                    | (5.7)  | 42                                         | (4.9)  | 66                 | (10.7) | 110                                  | (12.6) | 2.7                | 0.54 | 48  | (9.9)    | 82                      | (13.0) | 3.2  | 0.52 |
| <b>PPC</b>                          |                       |        |                                            |        |                    |        |                                      |        |                    |      |     |          |                         |        |      |      |
| Inadequate contact                  | 154                   | (25.0) | 231                                        | (26.8) | 124                | (20.0) | 157                                  | (18.1) | -                  | -    | 110 | (22.6)   | 96                      | (15.2) | -    | -    |
| Adequate contact with low quality   | 334                   | (54.1) | 458                                        | (53.1) | 309                | (49.8) | 439                                  | (50.5) | -                  | -    | 243 | (50.0)   | 320                     | (50.6) | -    | -    |
| Adequate contact with high quality  | 129                   | (20.9) | 174                                        | (20.2) | 187                | (30.2) | 274                                  | (31.5) | 2.0                | 0.73 | 133 | (27.4)   | 216                     | (34.2) | 7.4  | 0.27 |
| <b>PNC</b>                          |                       |        |                                            |        |                    |        |                                      |        |                    |      |     |          |                         |        |      |      |
| Inadequate contacts                 | 538                   | (87.2) | 749                                        | (86.8) | 281                | (45.3) | 329                                  | (37.8) | -                  | -    | 234 | (48.2)   | 203                     | (32.1) | -    | -    |
| Adequate contacts with low quality  | 61                    | (9.9)  | 103                                        | (11.9) | 199                | (32.1) | 248                                  | (28.5) | -                  | -    | 160 | (32.9)   | 188                     | (29.8) | -    | -    |
| Adequate contacts with high quality | 18                    | (2.9)  | 11                                         | (1.3)  | 140                | (22.6) | 293                                  | (33.7) | 12.7               | 0.14 | 92  | (18.9)   | 241                     | (38.1) | 20.7 | 0.01 |

<sup>†</sup>Potential effect of cluster correlations was adjusted using robust variance estimates. Living in a cluster with district hospital was included as a potential confounder in the model.

DiD, difference-in-difference estimator; *p*, p-value for DiD estimators.

Table 5 shows variations in having adequate contacts with high-quality care according to the characteristics of women in the intervention group in the follow-up survey. Women living in Navrongo were more likely to have adequate contacts with high-quality care during PPC and PNC than women living in Kintampo (AOR=0.24; 95% CI 0.10 to 0.54 at PPC, AOR=0.08; 95% CI 0.04 to 0.16 at PNC) and in Dodowa (AOR=0.19; 95% CI 0.09 to 0.38 at PPC; AOR=0.37; 95% CI 0.23 to 0.58 at PNC). During ANC, however, women living in Dodowa were more likely to have adequate contacts with high-quality care (AOR=2.75; 95% CI 1.49 to 5.06) than those living in Navrongo. Women with national health insurance membership were more likely to have adequate contacts with high-quality care during ANC (AOR=1.93; 95% CI 1.27 to 2.92) and PNC (AOR=1.46; 95% CI 1.12 to 1.89) than those without membership. Compared with women in the lowest wealth group, those in the highest wealth group were more likely to have adequate contacts with high-quality care during ANC (AOR=2.29; 95% CI 1.15 to 4.57) and PNC (AOR=1.83; 95% CI 1.04 to 3.23), and women in the lower wealth group were more likely to have adequate contacts with high-quality care during PPC (AOR=1.68; 95% CI 1.09 to 2.59). Women who had delivered at least twice were more likely to have adequate contacts with high-quality care during ANC than primiparous women (AOR=1.79, 95% CI 1.16 to 2.75).

Table 5 Factors associated with adequate contacts with high-quality care in the intervention group of the follow-up survey (n=870)

|                                        | ANC  |             | PPC  |             | PNC  |             |
|----------------------------------------|------|-------------|------|-------------|------|-------------|
|                                        | AOR  | (95% CI)    | AOR  | (95% CI)    | AOR  | (95% CI)    |
| <b>Study site</b>                      |      |             |      |             |      |             |
| Navrongo                               | 1.00 |             | 1.00 |             | 1.00 |             |
| Kintampo                               | 0.72 | (0.38-1.36) | 0.24 | (0.10-0.54) | 0.08 | (0.04-0.16) |
| Dodowa                                 | 2.75 | (1.49-5.06) | 0.19 | (0.09-0.38) | 0.37 | (0.23-0.58) |
| <b>Living near a district hospital</b> |      |             |      |             |      |             |
| Yes                                    | 1.46 | (0.78-2.73) | 1.60 | (0.83-3.09) | 1.10 | (0.70-1.74) |
| No                                     | 1.00 |             | 1.00 |             | 1.00 |             |

**National health insurance**

|             |      |             |      |             |      |             |
|-------------|------|-------------|------|-------------|------|-------------|
| Covered     | 1.93 | (1.27-2.92) | 1.18 | (0.76-1.81) | 1.46 | (1.12-1.89) |
| Not covered | 1.00 |             | 1.00 |             | 1.00 |             |

**Wealth quintiles**

|         |      |             |      |             |      |             |
|---------|------|-------------|------|-------------|------|-------------|
| Lowest  | 1.00 |             | 1.00 |             | 1.00 |             |
| Lower   | 0.66 | (0.24-1.78) | 1.68 | (1.09-2.59) | 1.14 | (0.79-1.65) |
| Middle  | 0.85 | (0.31-2.31) | 1.37 | (0.78-2.40) | 0.84 | (0.51-1.37) |
| Higher  | 2.16 | (0.96-4.89) | 1.33 | (0.71-2.46) | 1.09 | (0.66-1.80) |
| Highest | 2.29 | (1.15-4.57) | 1.14 | (0.61-2.11) | 1.83 | (1.04-3.23) |

**Parity**

|               |      |             |      |             |      |             |
|---------------|------|-------------|------|-------------|------|-------------|
| Once          | 1.00 |             | 1.00 |             | 1.00 |             |
| Twice or more | 1.79 | (1.16-2.75) | 1.25 | (0.91-1.72) | 0.92 | (0.59-1.41) |

Potential effect of cluster correlations was adjusted using robust variance estimates.

AOR, adjusted odds ratios by multiple logistic regression analyses.

## DISCUSSION

A 12-month implementation of the intervention showed significant effects on high quality care during regular contacts with health-care providers at PNC in the per-protocol design. In the intention-to-treat design, however, the intervention showed no significant effects during ANC, PPC, and PNC. In addition, a large gap remained between the crude contacts and quality-adjusted contacts. Hence, despite strengthening regular contacts with health-care providers through the intervention, women and their newborns did not receive high-quality care. Furthermore, a chance to have adequate contacts and receive high-quality care varied among women with different socio-demographic backgrounds (i.e. residential area, and membership of national health insurance) in the intervention group.

The results showed the intervention was efficacious in increasing postnatal contacts and improving the quality of care among those who actually received it, but did not provide evidence of

1  
2  
3  
4  
5 the effectiveness. Before implementing the intervention, we found that the women were not aware  
6 of the importance of PNC, and they believed in a local custom that women and their newborns  
7 should stay at home for 6 weeks postpartum. As shown in other intervention studies,<sup>25,26</sup> this  
8 intervention targeted to improve women's motivation and health-care provider's knowledge. Using  
9 the CoC card, women learned the importance and timings of PNC during ANC, and were given  
10 specific appointments for PNC visits. Health-care providers received a three-day training course  
11 and a monthly supervision from the district health management team. The result indicates that the  
12 intervention was efficacious, but did not reach all women equally.

13  
14 The intervention showed no significant effect on ANC. Only 12.6% of women in the  
15 intervention group had adequate contacts and received high-quality care. Low coverage of  
16 hemoglobin assessment, tetanus toxoid vaccination, and intermittent preventive treatment for  
17 malaria could result in low-quality care during ANC. During the intervention, we addressed these  
18 challenges by tracking the use of these care items and blood group test using the CoC card. After  
19 the intervention, blood group test significantly increased, whereas other care items did not change  
20 significantly. One possible explanation was that pregnant women were required to receive those  
21 care items multiple times. The percentage of women who had adequate contacts with high-quality  
22 care during ANC was higher in Dodowa (23.7%) than in Navrongo (9.3%) and Kintampo (4.5%). A  
23 potential explanation is that Dodowa has geographical advantages in procuring or accessing  
24 essential medicines and equipment for ANC as it is a part of Greater Accra region.

25  
26 Women living in Navrongo were more likely to have adequate contacts with health-care  
27 providers and receive high-quality care during PPC and PNC than those living in Kintampo and  
28 Dodowa, which suggests that the intervention package works effectively through the advanced  
29 primary health-care system in Navrongo. In Ghana, CHPS initiatives developed a community-based  
30 primary health-care system.<sup>19</sup> The initiatives was first introduced in Navrongo in 1994, and scaled-

1  
2  
3  
4  
5 up across the country.<sup>19</sup> However, the health system remains underdeveloped in most parts of the  
6 country, including Dodowa and Kintampo. Unequal assignment of midwives among the 3 study  
7 sites is a typical example, which could affect the availability and quality of maternal and newborn  
8 care. The intervention package could work more effectively in an improved health system.  
9

10  
11  
12  
13  
14 Women covered by the national health insurance were more likely to have adequate  
15 contacts and receive high-quality care during ANC and PNC, whereas women in the lowest wealth  
16 group were less likely to have adequate contacts with high-quality care during ANC and PNC  
17 compared with women in the highest wealth group. This highlights the importance of the national  
18 health insurance. Women with insurance membership could benefit from a free package of ANC,  
19 delivery, and PNC services with an annual premium of 12 Ghana Cedi (or around 2.7 USD).<sup>27</sup>  
20  
21  
22  
23  
24  
25  
26 However, only 63% of the women in this study had insurance membership. The evidence presented  
27 in this study would be useful in advocating for the enrollment of more women in the national health  
28 insurance scheme.  
29  
30  
31

### 32 33 34 35 **Limitations**

36  
37 This study has several limitations. First, cluster allocation was uneven, which could affect the  
38 implementation and effect of the intervention. The implementation in the intention-to-treat design  
39 allowed women to choose and utilize any health-care facilities across the clusters, which could also  
40 influence the effect of the intervention. Second, the study sites had been exposed to various research  
41 projects.<sup>28-31</sup> The effects of our intervention could be built on the effects of previous projects. Third,  
42 no standardized measurements for the quality of ANC, PPC, and PNC are available. Each quality of  
43 care index consists of different number of items. Moreover, although the value of each item was not  
44 equal, we treated all items with an equal weight. Thus, comparing the quality of care among ANC,  
45 PPC, and PNC would not be appropriate.  
46  
47  
48  
49  
50  
51  
52  
53  
54  
55  
56  
57  
58  
59  
60



## CONCLUSION

The intervention package for strengthening the continuum of care showed a significant effect on contacts with health-care providers and the quality of care in PNC, but not in ANC and PPC. Women and their newborns did not receive high-quality care during the regular contacts with health-care providers. The intervention package could work more effectively under a well-developed community-based health-care system and with broader national health insurance coverage. Ensuring adequate contacts with health-care providers and improving quality of care are both vital in promoting maternal and newborn health in Ghana.

## Funding

This paper was funded by the Japan International Cooperation Agency (JICA) Human Development Department, and JICA Research Institute (<http://www.jica.go.jp/english/index.html>). The funders had no role in study design, data collection and analysis, decision to publish, or preparation of the manuscript.

## Competing interests

All authors received the grant from Human Development Division, Japan International Cooperation Agency for implementing and evaluating this trial; no financial relationships with any organizations that might have an interest in this work in the previous 4 years; no other relationships or activities that could appear to have influenced this work.

## Authors' contribution

SO, MG, AS, KK, FY, CT, SA, KN, ARO, SOA, EKA, GQA, JY, AH, and MJ contributed to the conception and design of the study. SO, MG, FY, CT, SA, ARO, and SOA conducted interventions and collected data. SO, AS, KK, EKA, AH, and MJ interpreted data. SO conducted statistical

1  
2  
3  
4  
5 analysis and drafted manuscript. SO, MG, HHL, and MJ contributed to the revision of manuscript.

6  
7 All authors approved the final version of the manuscript. AH and MJ are the study guarantor.  
8  
9

### 10 **Patient consent**

11  
12 The study was approved by the Ethics Review Committee of Ghana Health Service, the Institutional  
13 Review Boards of Dodowa HRC and Navrongo HRC, the Institutional Ethics Committee of  
14 Kintampo HRC in Ghana, and the Research Ethics Committee of the University of Tokyo in Japan.  
15  
16 At the enrolment of the baseline and follow-up surveys, we obtained written informed consent from  
17 the women. If the women were under the age of 18, we requested permission from their guardians  
18 and obtained their signature on the consent form. At the study enrolment, we obtained oral informed  
19 consent from the women to receive the interventions. The study protocol was registered in the  
20  
21  
22  
23  
24  
25  
26  
27  
28  
29  
30  
31  
32  
33  
34  
35  
36  
37  
38  
39  
40  
41  
42  
43  
44  
45  
46  
47  
48  
49  
50  
51  
52  
53  
54  
55  
56  
57  
58  
59  
60

### 30 **Data sharing**

31  
32 The datasets used and/or analyzed during the current study are available on reasonable request from  
33 the corresponding author (MJ) under permission by all relevant ethics committees.  
34  
35  
36  
37

### 38 **Acknowledgements**

39  
40 The authors thank the Ministry of Foreign Affairs in Japan and the Ministry of Health in Ghana. We  
41 also express our gratitude to the Ghana Health Service and the District Health Management Teams  
42 of the Shai-Osudoku, Ningo-Prampram, Kintampo North, Kintampo South, Kassena Nankana East,  
43 and Kassena Nankana West for their support and cooperation to this study.  
44  
45  
46  
47

48 The Ghana EMBRACE Implementation Research Project was conducted by the Government of the  
49 Republic of Ghana, Japan International Cooperation Agency (JICA) Human Development  
50 Department, and JICA Research Institute with a coordinating support from the System Science  
51 Consultancy Inc.  
52  
53  
54  
55  
56  
57  
58  
59  
60

1  
2  
3  
4  
5 The content is solely the responsibility of the authors and does not necessarily represent the official  
6 views of JICA Human Development Department, JICA Research Institute, and Ghana Health  
7 Service. The System Science Consultants Inc. was a research coordinating team member of the  
8 study. It does not have any funding role on the study, and their activities have no influence on the  
9 study's outcomes.  
10  
11  
12  
13  
14

15  
16 The Ghana EMBRACE Implementation Research Project Team Authors:

17  
18 Project Director: Yoshiharu Yoneyama

19  
20 Project Manager: Ebenezer Appiah-Denkyira

21  
22 Principal Investigator: Masamine Jimba

23  
24 Co-principal Investigator: Abraham Hodgson

25  
26 Research Members: Gloria Quansah Asare, Evelyn Ansah; Junko Yasuoka, Keiko Nanishi, Akira

27  
28 Shibanuma, Kimiyo Kikuchi, Sumiyo Okawa; Margaret Gyapong, Sheila Addei, Vida Kukula,

29  
30 Doris Sarpong, Clement Narh; Seth Owusu-Agyei, Kwaku Poku-Asante, Charlotte Tawiah, Yeetey

31  
32 Enuameh, Kwame Adjei, Emmanuel Mahama; Abraham Oduro, John Williams, Cornelius Debpuur,

33  
34 Francis Yeji, Evelyn Sakeah, Peter Wontuo; Akiko Hagiwara, Sakiko Shiratori; Yusuke Kamiya.

35  
36  
37 We would also like to thank Professor Ana Langer and Associate Professor Margaret E.  
38 Kruk, Department of Global Health and Population, Harvard T. H. Chan School of Public Health,  
39 for their technical advice. We also thank the Takemi Program in International Health, Harvard T. H.  
40 Chan School of Public Health, and Japan Medical Associations for their support.  
41  
42  
43  
44  
45  
46  
47

## 48 REFERENCES

- 49  
50  
51 1. Lawn JE, Blencowe H, Oza S, *et al.* Every Newborn: progress, priorities, and potential  
52 beyond survival. *Lancet* 2014;384(9938):189-205.  
53  
54  
55  
56  
57  
58  
59  
60

- 1  
2  
3  
4  
5 2. Ronsmans C, Graham WJ. Maternal mortality: who, when, where, and why. *Lancet*  
6 2006;368(9542):1189-1200.  
7  
8
- 9 3. Kerber KJ, de Graft-Johnson JE, Bhutta ZA, *et al.* Continuum of care for maternal,  
10 newborn, and child health: from slogan to service delivery. *Lancet* 2007;370(9595):1358-  
11 1369.  
12  
13
- 14 4. Yeji F, Shibanuma A, Oduro A, *et al.* Continuum of Care in a Maternal, Newborn and  
15 Child Health Program in Ghana: Low Completion Rate and Multiple Obstacle Factors.  
16 *PLoS One* 2015;10(12):e0142849.  
17  
18
- 19 5. World Health Organization (WHO). *Standards for improving quality of maternal and*  
20 *newborn care in health facilities.* Geneva: WHO, 2016.  
21  
22
- 23 6. Raven JH, Tolhurst RJ, Tang S, *et al.* What is quality in maternal and neonatal health care?  
24 *Midwifery* 2012;28(5):e676-683.  
25  
26
- 27 7. Donabedian-A. The quality of care: How can it be assessed? *JAMA* 1988;260(12):1743-  
28 1748.  
29  
30
- 31 8. Heredia-Pi I, Servan-Mori E, Darney BG, *et al.* Measuring the adequacy of antenatal health  
32 care: a national cross-sectional study in Mexico. *Bull World Health Organ* 2016;94(6):452-  
33 461.  
34  
35
- 36 9. Kruk ME, Leslie HH, Verguet S, *et al.* Quality of basic maternal care functions in health  
37 facilities of five African countries: an analysis of national health system surveys. *Lancet*  
38 *Glob Health* 2016;4(11):e845-e855.  
39  
40
- 41 10. Kyei NN, Chansa C, Gabrysch S. Quality of antenatal care in Zambia: a national  
42 assessment. *BMC Pregnancy Childbirth* 2012;12:151.  
43  
44  
45  
46  
47  
48  
49  
50  
51  
52  
53  
54  
55  
56  
57  
58  
59  
60

- 1  
2  
3  
4  
5 11. Joshi C, Torvaldsen S, Hodgson R, *et al.* Factors associated with the use and quality of  
6 antenatal care in Nepal: a population-based study using the demographic and health survey  
7 data. *BMC Pregnancy Childbirth* 2014;14:94.  
8  
9
- 10  
11 12. Marchant T, Tilley-Gyado RD, Tessema T, *et al.* Adding content to contacts: measurement  
12 of high quality contacts for maternal and newborn health in Ethiopia, north east Nigeria,  
13 and Uttar Pradesh, India. *PLoS One* 2015;10(5):e0126840.  
14  
15
- 16  
17 13. Nesbitt RC, Lohela TJ, Manu A, *et al.* Quality along the continuum: a health facility  
18 assessment of intrapartum and postnatal care in Ghana. *PLoS One* 2013;8(11):e81089.  
19  
20
- 21  
22 14. Azad K, Barnett S, Banerjee B, *et al.* Effect of scaling up women's groups on birth  
23 outcomes in three rural districts in Bangladesh: a cluster-randomised controlled trial. *Lancet*  
24 2010;375(9721):1193-1202.  
25  
26
- 27  
28 15. Lewycka S, Mwansambo C, Rosato M, *et al.* Effect of women's groups and volunteer peer  
29 counselling on rates of mortality, morbidity, and health behaviours in mothers and children  
30 in rural Malawi (MaiMwana): a factorial, cluster-randomised controlled trial. *Lancet*  
31 2013;381(9879):1721-1735.  
32  
33
- 34  
35 16. Manandhar DS, Osrin D, Shrestha BP, *et al.* Effect of a participatory intervention with  
36 women's groups on birth outcomes in Nepal: cluster-randomised controlled trial. *Lancet*  
37 2004;364(9438):970-979.  
38  
39
- 40  
41 17. WHO. Ghana: WHO statistical profile. 2015.  
42 <http://www.who.int/gho/countries/gha.pdf?ua=1> (Accessed 8 July 2018).  
43  
44
- 45  
46 18. Ghana Statistical Service (GSS), Ghana Health Service (GHS), ICF International.  
47 *Ghana Demographic and Health Survey 2014*. Rockville, Maryland: GSS, GHS, and ICF  
48 International, 2015.  
49  
50  
51  
52  
53  
54  
55  
56  
57  
58  
59  
60

- 1  
2  
3  
4  
5  
6  
7  
8  
9  
10  
11  
12  
13  
14  
15  
16  
17  
18  
19  
20  
21  
22  
23  
24  
25  
26  
27  
28  
29  
30  
31  
32  
33  
34  
35  
36  
37  
38  
39  
40  
41  
42  
43  
44  
45  
46  
47  
48  
49  
50  
51  
52  
53  
54  
55  
56  
57  
58  
59  
60
19. Nyongator FK, Awoonor-Williams JK, Phillips JF, *et al*. The Ghana community-based health planning and services initiative for scaling up service delivery innovation. *Health Policy Plan* 2005;20(1):25-34.
  20. Odeyemi IA, Nixon J. Assessing equity in health care through the national health insurance schemes of Nigeria and Ghana: a review-based comparative analysis. *Int J Equity Health* 2013;12:9.
  21. Okada K. Japan's new global health policy: 2011-2015. *Lancet* 2010;376(9745):938-940.
  22. Kikuchi K, Ansah E, Okawa S, *et al*. Ghana's Ensure Mothers and Babies Regular Access to Care (EMBRACE) program: study protocol for a cluster randomized controlled trial. *Trials* 2015;16:22.
  23. Ghana Health Service (GHS). *National safe motherhood service protocol*. Accra: GHS, 2008.
  24. Singal AG, Higgins PD, Waljee AK. A primer on effectiveness and efficacy trials. *Clin Transl Gastroenterol* 2014;5:e45.
  25. Warren C, Mwangi A, Oweya E, *et al*. Safeguarding maternal and newborn health: improving the quality of postnatal care in Kenya. *Int J Qual Health Care* 2010;22(1):24-30.
  26. Watt C, Abuya T, Warren CE, *et al*. Can reproductive health voucher programs improve quality of postnatal care? A quasi-experimental evaluation of Kenya's safe motherhood voucher scheme. *PLoS One* 2015;10(4):e0122828.
  27. HERA, Health Partners. Evaluation of the Free maternal health care initiative in Ghana. 2013. [https://www.unicef.org/evaldatabase/files/Ghana\\_130517\\_Final\\_Report.pdf](https://www.unicef.org/evaldatabase/files/Ghana_130517_Final_Report.pdf) (Accessed 8 July 2018).

- 1  
2  
3  
4  
5  
6  
7  
8  
9  
10  
11  
12  
13  
14  
15  
16  
17  
18  
19  
20  
21  
22  
23  
24  
25  
26  
27  
28  
29  
30  
31  
32  
33  
34  
35  
36  
37  
38  
39  
40  
41  
42  
43  
44  
45  
46  
47  
48  
49  
50  
51  
52  
53  
54  
55  
56  
57  
58  
59  
60
28. Kirkwood BR, Manu A, ten Asbroek AH, *et al.* Effect of the Newhints home-visits intervention on neonatal mortality rate and care practices in Ghana: a cluster randomised controlled trial. *Lancet* 2013;381(9884):2184-2192.
29. LeFevre AE, Mohan D, Hutchful D, *et al.* Mobile Technology for Community Health in Ghana: what happens when technical functionality threatens the effectiveness of digital health programs? *BMC Med Inform Decis Mak* 2017;17(1):27.
30. Mensah N, Sukums F, Awine T, *et al.* Impact of an electronic clinical decision support system on workflow in antenatal care: the QUALMAT eCDSS in rural health care facilities in Ghana and Tanzania. *Glob Health Action* 2015;8:25756.
31. OGBL Solidarité syndicale a.s.b.l. Ghana-Luxembourg Ssocial Trus: Promoting social security through solidarity as an instrument of sustainable development pilot project. 2015. [http://www.ogbl.lu/solidaritesyndicale/files/2015/07/Ghana\\_Brosch\\_EN.pdf](http://www.ogbl.lu/solidaritesyndicale/files/2015/07/Ghana_Brosch_EN.pdf) (Accessed 8 July 2018).

1  
2  
3  
4  
5  
6  
7  
8  
9  
10  
11  
12  
13  
14  
15  
16  
17  
18  
19  
20  
21  
22  
23  
24  
25  
26  
27  
28  
29  
30  
31  
32  
33  
34  
35  
36  
37  
38  
39  
40  
41  
42  
43  
44  
45  
46  
47  
48  
49  
50  
51  
52  
53  
54  
55  
56  
57  
58  
59  
60

For peer review only



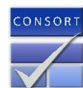

## CONSORT 2010 checklist of information to include when reporting a randomised trial\*

| Section/Topic                    | Item No | Checklist item                                                                                                                                                                              | Reported on page No |
|----------------------------------|---------|---------------------------------------------------------------------------------------------------------------------------------------------------------------------------------------------|---------------------|
| <b>Title and abstract</b>        |         |                                                                                                                                                                                             |                     |
|                                  | 1a      | Identification as a randomised trial in the title                                                                                                                                           | 1                   |
|                                  | 1b      | Structured summary of trial design, methods, results, and conclusions (for specific guidance see CONSORT for abstracts)                                                                     | 3                   |
| <b>Introduction</b>              |         |                                                                                                                                                                                             |                     |
| Background and objectives        | 2a      | Scientific background and explanation of rationale                                                                                                                                          | 5-6                 |
|                                  | 2b      | Specific objectives or hypotheses                                                                                                                                                           | 6                   |
| <b>Methods</b>                   |         |                                                                                                                                                                                             |                     |
| Trial design                     | 3a      | Description of trial design (such as parallel, factorial) including allocation ratio                                                                                                        | 6-7                 |
|                                  | 3b      | Important changes to methods after trial commencement (such as eligibility criteria), with reasons                                                                                          | NA                  |
| Participants                     | 4a      | Eligibility criteria for participants                                                                                                                                                       | 7,8                 |
|                                  | 4b      | Settings and locations where the data were collected                                                                                                                                        | 6,7                 |
| Interventions                    | 5       | The interventions for each group with sufficient details to allow replication, including how and when they were actually administered                                                       | 7,8                 |
| Outcomes                         | 6a      | Completely defined pre-specified primary and secondary outcome measures, including how and when they were assessed                                                                          | 9,10, Table1        |
|                                  | 6b      | Any changes to trial outcomes after the trial commenced, with reasons                                                                                                                       | NA                  |
| Sample size                      | 7a      | How sample size was determined                                                                                                                                                              | 8                   |
|                                  | 7b      | When applicable, explanation of any interim analyses and stopping guidelines                                                                                                                | NA                  |
| <b>Randomisation:</b>            |         |                                                                                                                                                                                             |                     |
| Sequence generation              | 8a      | Method used to generate the random allocation sequence                                                                                                                                      | 7                   |
|                                  | 8b      | Type of randomisation; details of any restriction (such as blocking and block size)                                                                                                         | 7                   |
| Allocation concealment mechanism | 9       | Mechanism used to implement the random allocation sequence (such as sequentially numbered containers), describing any steps taken to conceal the sequence until interventions were assigned | 7                   |
| Implementation                   | 10      | Who generated the random allocation sequence, who enrolled participants, and who assigned participants to interventions                                                                     | 7                   |
| Blinding                         | 11a     | If done, who was blinded after assignment to interventions (for example, participants, care providers, those                                                                                | 7                   |

|                                                      |     |                                                                                                                                                   |                     |
|------------------------------------------------------|-----|---------------------------------------------------------------------------------------------------------------------------------------------------|---------------------|
|                                                      |     | assessing outcomes) and how                                                                                                                       |                     |
|                                                      | 11b | If relevant, description of the similarity of interventions                                                                                       | NA                  |
| Statistical methods                                  | 12a | Statistical methods used to compare groups for primary and secondary outcomes                                                                     | 11-12               |
|                                                      | 12b | Methods for additional analyses, such as subgroup analyses and adjusted analyses                                                                  | 11-12               |
| <b>Results</b>                                       |     |                                                                                                                                                   |                     |
| Participant flow (a diagram is strongly recommended) | 13a | For each group, the numbers of participants who were randomly assigned, received intended treatment, and were analysed for the primary outcome    | 12                  |
|                                                      | 13b | For each group, losses and exclusions after randomisation, together with reasons                                                                  | 12                  |
| Recruitment                                          | 14a | Dates defining the periods of recruitment and follow-up                                                                                           | 8                   |
|                                                      | 14b | Why the trial ended or was stopped                                                                                                                | 7                   |
| Baseline data                                        | 15  | A table showing baseline demographic and clinical characteristics for each group                                                                  | 13, Table2          |
| Numbers analysed                                     | 16  | For each group, number of participants (denominator) included in each analysis and whether the analysis was by original assigned groups           | 12                  |
| Outcomes and estimation                              | 17a | For each primary and secondary outcome, results for each group, and the estimated effect size and its precision (such as 95% confidence interval) | 12-17, Tables 2,3,4 |
|                                                      | 17b | For binary outcomes, presentation of both absolute and relative effect sizes is recommended                                                       | 18,19, Table5       |
| Ancillary analyses                                   | 18  | Results of any other analyses performed, including subgroup analyses and adjusted analyses, distinguishing pre-specified from exploratory         | 15-17, Table4       |
| Harms                                                | 19  | All important harms or unintended effects in each group (for specific guidance see CONSORT for harms)                                             | NA                  |
| <b>Discussion</b>                                    |     |                                                                                                                                                   |                     |
| Limitations                                          | 20  | Trial limitations, addressing sources of potential bias, imprecision, and, if relevant, multiplicity of analyses                                  | 21                  |
| Generalisability                                     | 21  | Generalisability (external validity, applicability) of the trial findings                                                                         | 19-21               |
| Interpretation                                       | 22  | Interpretation consistent with results, balancing benefits and harms, and considering other relevant evidence                                     | 19-21               |
| <b>Other information</b>                             |     |                                                                                                                                                   |                     |
| Registration                                         | 23  | Registration number and name of trial registry                                                                                                    | 4                   |
| Protocol                                             | 24  | Where the full trial protocol can be accessed, if available                                                                                       | Referenece22        |
| Funding                                              | 25  | Sources of funding and other support (such as supply of drugs), role of funders                                                                   | 22                  |

\*We strongly recommend reading this statement in conjunction with the CONSORT 2010 Explanation and Elaboration for important clarifications on all the items. If relevant, we also recommend reading CONSORT extensions for cluster randomised trials, non-inferiority and equivalence trials, non-pharmacological treatments, herbal interventions, and pragmatic trials. Additional extensions are forthcoming: for those and for up to date references relevant to this checklist, see [www.consort-statement.org](http://www.consort-statement.org).

# BMJ Open

## Effect of continuum-of-care intervention package on improving contacts and quality of maternal and newborn health care in Ghana: a cluster randomized controlled trial

|                                 |                                                                                                                                                                                                                                                                                                                                                                                                                                                                                                                                                                                                                                                                                                                                                                                                                                                                                                                                                                                                                                                                                                                                                                                                                                                                                                                                                                                                                                                                                                                                                                                                                                                                                                                                                                                                                         |
|---------------------------------|-------------------------------------------------------------------------------------------------------------------------------------------------------------------------------------------------------------------------------------------------------------------------------------------------------------------------------------------------------------------------------------------------------------------------------------------------------------------------------------------------------------------------------------------------------------------------------------------------------------------------------------------------------------------------------------------------------------------------------------------------------------------------------------------------------------------------------------------------------------------------------------------------------------------------------------------------------------------------------------------------------------------------------------------------------------------------------------------------------------------------------------------------------------------------------------------------------------------------------------------------------------------------------------------------------------------------------------------------------------------------------------------------------------------------------------------------------------------------------------------------------------------------------------------------------------------------------------------------------------------------------------------------------------------------------------------------------------------------------------------------------------------------------------------------------------------------|
| Journal:                        | <i>BMJ Open</i>                                                                                                                                                                                                                                                                                                                                                                                                                                                                                                                                                                                                                                                                                                                                                                                                                                                                                                                                                                                                                                                                                                                                                                                                                                                                                                                                                                                                                                                                                                                                                                                                                                                                                                                                                                                                         |
| Manuscript ID                   | bmjopen-2018-025347.R1                                                                                                                                                                                                                                                                                                                                                                                                                                                                                                                                                                                                                                                                                                                                                                                                                                                                                                                                                                                                                                                                                                                                                                                                                                                                                                                                                                                                                                                                                                                                                                                                                                                                                                                                                                                                  |
| Article Type:                   | Research                                                                                                                                                                                                                                                                                                                                                                                                                                                                                                                                                                                                                                                                                                                                                                                                                                                                                                                                                                                                                                                                                                                                                                                                                                                                                                                                                                                                                                                                                                                                                                                                                                                                                                                                                                                                                |
| Date Submitted by the Author:   | 11-Apr-2019                                                                                                                                                                                                                                                                                                                                                                                                                                                                                                                                                                                                                                                                                                                                                                                                                                                                                                                                                                                                                                                                                                                                                                                                                                                                                                                                                                                                                                                                                                                                                                                                                                                                                                                                                                                                             |
| Complete List of Authors:       | Okawa, Sumiyo; Graduate School of Medicine, the University of Tokyo, Department of Community and Global Health<br>Gyapong, Margaret; Dodowa Health Research Centre; University of Health & Allied Sciences, Institute of Health Research<br>Leslie, Hannah; Harvard T. H. Chan School of Public Health, Department of Global Health and Population<br>Shibanuma, Akira; Graduate School of Medicine, the University of Tokyo, Department of Community and Global Health<br>Kikuchi, Kimiyo; Kyushu University, Institute of Decision Science for a Sustainable Society; Graduate School of Medicine, The University of Tokyo, Department of Community and Global Health<br>Yeji, Francis; Navrongo Health Research Centre<br>Tawiah, Charlotte; Kintampo Health Research Centre<br>Addei, Sheila; Dodowa Health Research Centre<br>Nanishi, Keiko; Graduate School of Medicine and Faculty of Medicine, The University of Tokyo, Office of International Academic Affairs; Graduate School of Medicine, The University of Tokyo, Department of Community and Global Health<br>Oduro, Abraham; Navrongo Health Research Centre, Epidemiology<br>Owusu-Agyei, Seth; Kintampo Health Research Centre<br>Ansah, Evelyn; Ghana Health Service, Headquarters; University of Health & Allied Sciences, Institute of Health Research<br>Asare, Gloria; Ghana Health Service, Headquarters<br>Yasuoka, Junko; Graduate School of Medicine, the University of Tokyo, Department of Community and Global Health; Tokyo University of Agriculture and Technology, Research and Education Center for Prevention of Global Infectious Diseases of Animals<br>Hodgson, Abraham; Ghana Health Service, Headquarters<br>Jimba, Masamine; Graduate School of Medicine, The University of Tokyo, Department of Community and Global Health |
| <b>Primary Subject Heading</b>: | Global health                                                                                                                                                                                                                                                                                                                                                                                                                                                                                                                                                                                                                                                                                                                                                                                                                                                                                                                                                                                                                                                                                                                                                                                                                                                                                                                                                                                                                                                                                                                                                                                                                                                                                                                                                                                                           |
| Secondary Subject Heading:      | Epidemiology, Health services research, Public health                                                                                                                                                                                                                                                                                                                                                                                                                                                                                                                                                                                                                                                                                                                                                                                                                                                                                                                                                                                                                                                                                                                                                                                                                                                                                                                                                                                                                                                                                                                                                                                                                                                                                                                                                                   |
| Keywords:                       | Quality in health care < HEALTH SERVICES ADMINISTRATION & MANAGEMENT, Maternal medicine < OBSTETRICS, Community child health < PAEDIATRICS                                                                                                                                                                                                                                                                                                                                                                                                                                                                                                                                                                                                                                                                                                                                                                                                                                                                                                                                                                                                                                                                                                                                                                                                                                                                                                                                                                                                                                                                                                                                                                                                                                                                              |

1  
2  
3  
4  
5  
6  
7  
8  
9  
10  
11  
12  
13  
14  
15  
16  
17  
18  
19  
20  
21  
22  
23  
24  
25  
26  
27  
28  
29  
30  
31  
32  
33  
34  
35  
36  
37  
38  
39  
40  
41  
42  
43  
44  
45  
46  
47  
48  
49  
50  
51  
52  
53  
54  
55  
56  
57  
58  
59  
60

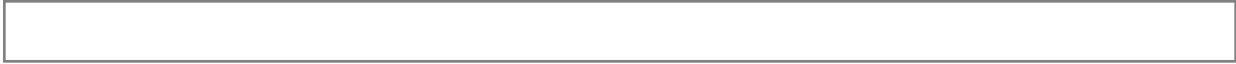

SCHOLARONE™  
Manuscripts

1  
2  
3  
4  
5  
6  
7  
8  
9  
10  
11  
12  
13  
14  
15  
16  
17  
18  
19  
20  
21  
22  
23  
24  
25  
26  
27  
28  
29  
30  
31  
32  
33  
34  
35  
36  
37  
38  
39  
40  
41  
42  
43  
44  
45  
46  
47  
48  
49  
50  
51  
52  
53  
54  
55  
56  
57  
58  
59  
60

1 **Effect of continuum-of-care intervention package on improving contacts and**  
2 **quality of maternal and newborn health care in Ghana: a cluster randomized**  
3 **controlled trial**

4 Sumiyo Okawa<sup>1</sup>, Margaret Gyapong<sup>2,3</sup>, Hannah H Leslie<sup>4</sup>, Akira Shibanuma<sup>1</sup>, Kimiyo Kikuchi<sup>1,5</sup>, Francis Yeji<sup>6</sup>, Charlotte Tawiah<sup>7</sup>, Sheila Addei<sup>2</sup>, Keiko Nanishi<sup>1,8</sup>, Abraham Rexford Oduro<sup>6</sup>, Seth Owusu-Agyei<sup>7</sup>, Evelyn Ansah<sup>3,9</sup>, Gloria Quansah Asare<sup>9</sup>, Junko Yasuoka<sup>1,10</sup>, Abraham Hodgson<sup>9</sup>, Masamine Jimba<sup>1\*</sup> on behalf of Ghana EMBRACE Implementation Research Project Team

11 **Author affiliations**

12 <sup>1</sup> Department of Community and Global Health, Graduate School of Medicine, The University  
13 of Tokyo, 7-3-1 Hongo, Bunkyo-ku, Tokyo Japan

14 <sup>2</sup> Dodowa Health Research Centre, P.O. Box DD1, Dodowa, Greater Accra, Ghana

15 <sup>3</sup> Institute of Health Research, University of Health & Allied Sciences, Ho, Ghana

16 <sup>4</sup> Department of Global Health and Population, Harvard T.H. Chan School of Public Health,  
17 Boston, MA, USA

18 <sup>5</sup> Institute of Decision Science for a Sustainable Society, Kyushu University, Fukuoka, Japan

19 <sup>6</sup> Navrongo Health Research Centre, P.O. Box 114, Navrongo, Upper-East, Ghana

20 <sup>7</sup> Kintampo Health Research Centre, P.O. Box 200, Kintampo, Brong-Ahafo, Ghana

21 <sup>8</sup> Office of International Academic Affairs, Graduate School of Medicine and Faculty of  
22 Medicine, The University of Tokyo, Tokyo, Japan

23 <sup>9</sup> Ghana Health Service Headquarters, Accra, Ghana

24 <sup>10</sup> Research and Education Center for Prevention of Global Infectious Diseases of Animals,  
25 Tokyo University of Agriculture and Technology

1  
2  
3  
4  
5  
6  
7  
8  
9  
10  
11  
12  
13  
14  
15  
16  
17  
18  
19  
20  
21  
22  
23  
24  
25  
26  
27  
28  
29  
30  
31  
32  
33  
34  
35  
36  
37  
38  
39  
40  
41  
42  
43  
44  
45  
46  
47  
48  
49  
50  
51  
52  
53  
54  
55  
56  
57  
58  
59  
60

27 **\*Corresponding author:** Masamine Jimba

28 Postal address: 7-3-1, Hongo, Bunkyo-ku, Tokyo, 113-0033, Japan

29 Email: [mjimba@m.u-tokyo.ac.jp](mailto:mjimba@m.u-tokyo.ac.jp)

30 Telephone number: +81-338122111

31 **Word count:** 4349

For peer review only

1  
2  
3  
4  
5  
6  
7  
8  
9  
10  
11  
12  
13  
14  
15  
16  
17  
18  
19  
20  
21  
22  
23  
24  
25  
26  
27  
28  
29  
30  
31  
32  
33  
34  
35  
36  
37  
38  
39  
40  
41  
42  
43  
44  
45  
46  
47  
48  
49  
50  
51  
52  
53  
54  
55  
56  
57  
58  
59  
60

## 32 ABSTRACT

33 **Objective:** To evaluate the effect of a continuum-of-care intervention package on adequate  
34 contacts of women and newborn with healthcare providers and their reception of high-quality  
35 care.

36 **Design:** Cluster randomized controlled trial.

37 **Setting:** 32 sub-districts in 3 rural sites in Ghana.

38 **Participants:** The baseline survey involved 1,480 women who delivered before the  
39 intervention, and the follow-up survey involved 1,490 women who received maternal and  
40 newborn care during the trial.

41 **Interventions:** The intervention package included: training healthcare providers, utilizing an  
42 educational and recording tool named “continuum-of-care card”, providing the first postnatal  
43 care (PNC) by retaining women and newborns at healthcare facility or home visit by healthcare  
44 providers.

45 **Outcome measures:** Adequate contacts were defined as at least 4 contacts during pregnancy,  
46 delivery with assistance of skilled healthcare providers at a healthcare facility, and 3 timely  
47 contacts within 6 weeks postpartum. High-quality care was defined as receiving 6 care items for  
48 antenatal care (ANC), 3 for peripartum care (PPC), and 14 for PNC.

49 **Results:** The difference-in-difference method was used to assess the effects of the intervention  
50 on the study outcome. The percentage of adequate contacts with high-quality care in the  
51 intervention group in the follow-up survey and the adjusted difference-in-difference estimators  
52 were 12.6% and 2.2 ( $p=0.61$ ) at ANC, 31.5% and 1.9 ( $p=0.73$ ) at PPC, and 33.7% and 12.3  
53 ( $p=0.13$ ) at PNC in the intention-to-treat design, whereas 13.0% and 2.8 ( $p=0.54$ ) at ANC,  
54 34.2% and 2.7 ( $p=0.66$ ) at PPC, and 38.1% and 18.1 ( $p=0.02$ ) at PNC in the per-protocol design  
55 that assigned the study sample by possession of the continuum-of-care card.

1  
2  
3  
4  
5  
6 56 **Conclusions:** The interventions improved contacts with healthcare providers and quality of care  
7  
8 57 during PNC. However, having adequate contact did not guarantee high-quality care. Maternal  
9  
10 58 and newborn care in Ghana needs to improve its continuity and quality.

11  
12 59 **Trial registration number:** (90618993)  
13  
14 60

### 61 **Strengths and Limitations**

- 16  
17  
18 62 • This was a cluster randomized controlled trial conducted in three rural sites which had  
19  
20 63 diverse socio-economic and ecological backgrounds and operated the Health and  
21  
22 64 Demographic Surveillance System.
- 23  
24  
25 65 • This study assessed the effect of the intervention on having adequate contact of women and  
26  
27 66 their newborns with healthcare providers and their reception of high-quality care in  
28  
29 67 antenatal, peripartum, and postnatal care.
- 30  
31 68 • The results showed that regular contacts with healthcare providers did not guarantee quality  
32  
33 69 of care, although the results could be affected by uneven cluster allocation and  
34  
35 70 contamination.
- 36  
37  
38 71 • Maternal and newborn care program needs to improve continuity and quality of care in  
39  
40 72 Ghana.  
41  
42  
43 73



## 74 INTRODUCTION

75 Maternal and newborn health has significantly improved during the Millennium Development  
76 Goals era. Women and newborns still encounter a life-threatening risk from the third trimester  
77 to the first month postpartum in resource limited countries.[1, 2] A key strategy to maintain  
78 maternal and neonatal health throughout the high risk period is to provide effective  
79 interventions continuously during the high-risk period,[3] namely Continuum of Care (CoC).  
80 However, CoC remains a critical challenge in many countries. In our previous study, for  
81 example, only 8% of women completed CoC from pregnancy to postpartum period.[4]  
82 Moreover, regular contacts with healthcare providers alone would not improve maternal and  
83 newborn health outcomes if they did not receive quality care.[5]

84 Maternal and newborn health research provides no comprehensive definition and  
85 measurements of quality of care when we designed this study.[6] In 1988, Donabedian  
86 suggested a framework for quality of care assessment.[7] In the framework, quality of care is  
87 assessed with 3 dimensions: structure, process, and outcomes.[7] Using this framework, existing  
88 literature measured quality of care by creating composite indexes of structure and/or process of  
89 care,[8-11] and identified remarkable gaps between contacts with healthcare providers and  
90 actual quality of care during the contacts.[9, 10, 12, 13] In addition, previous studies evaluated  
91 the effects of interventions on improving process of care (e.g., receiving iron tablets, tetanus  
92 toxoid injections, HIV testing, intermittent preventive treatment for malaria, or basic newborn  
93 care).[14-16] However, to our best knowledge, few intervention studies have evaluated the  
94 effects of interventions on both contacts with healthcare providers and quality of care from  
95 pregnancy to the postpartum period.

96 Ghana is one of the sub-Saharan African countries with an estimated maternal mortality  
97 ratio of 380/100,000 live births in 2013.[17] Neonatal mortality rate was 29/1,000 live births in  
98 2010-2014, with a minor reduction in the last decade.[18] The government of Ghana introduced  
99 health policies to mitigate the financial and geographical constraints affecting the access to

1  
2  
3  
4  
5 100 healthcare services: community-based health planning and services (CHPS) initiative in  
6  
7 101 1999,[19] and national health insurance scheme in 2004.[20] In this scheme, pregnant women  
8  
9 102 are able to obtain their health insurance which includes a free package of ANC, delivery,  
10  
11 103 caesarean section, and PNC services without paying the annual premium and processing  
12  
13 104 fees.[21, 22] Our previous studies showed that women with national health insurance were more  
14  
15 105 likely to have four ANC visits and deliver at a healthcare facility.[23, 24] Despite improvements  
16  
17 106 in coverage for maternal and child health, further effort is needed to strengthen the CoC and  
18  
19 107 improve the quality of care under the implementation of these policies.

20  
21  
22 108 Ghana's Ensure Mothers and Babies Regular Access to Care (EMBRACE)  
23  
24 109 implementation research aimed to strengthen CoC.[25] The major activities included the  
25  
26 110 development and implementation of an intervention package and evaluation of its effect on  
27  
28 111 CoC. Based on the findings of formative research,[4] we developed an intervention package to  
29  
30 112 ensure CoC with healthcare providers during ANC, peripartum care (PPC), and PNC. Although  
31  
32 113 CoC is the primary outcome for the impact evaluation,[26] quality of care during the regular  
33  
34 114 contacts is another important outcome for the process evaluation, which provides multifaceted  
35  
36 115 implications for maternal and newborn health program. Therefore, the objectives of this study  
37  
38 116 were to examine the effects of the CoC intervention package on having adequate contacts with  
39  
40 117 healthcare providers and high-quality care by the mothers and their newborns compared to the  
41  
42 118 standard maternal and newborn care under the national guidelines, and to determine the factors  
43  
44 119 associated with having adequate contacts with high-quality care among those in the intervention  
45  
46 120 group in the follow-up survey.

## 47 48 49 50 121 **METHODS**

### 51 52 122 **Study design and setting**

53  
54 123 This was a cluster randomized controlled trial using the effectiveness-implementation hybrid  
55  
56 124 design registered in ISRCTN (90618993).[26] In order to enhance the generalizability of study  
57  
58  
59  
60

1  
2  
3  
4  
5 125 findings in rural setting of Ghana, we selected 3 rural sites: Navrongo (northern), Kintampo  
6  
7 126 (central), and Dodowa (southern) which had diverse socio-economic and ecological background  
8  
9 127 and health systems challenges. Additionally, these study sites had Health Research Centers  
10  
11 128 (HRCs) under the Ghana Health Service, and these HRCs operated the Health and Demographic  
12  
13 129 Surveillance System. Such research infrastructure could be beneficial for the quality control of  
14  
15 130 the intervention and surveys.

16  
17  
18 131 Each study site covered 2 districts and consisted of 36 sub-districts. We included 32  
19  
20 132 sub-districts in this study (Navrongo, 12; Kintampo, 12; and Dodowa, 8) and excluded 4 sub-  
21  
22 133 districts because of other projects implemented or planned during our intervention period. We  
23  
24 134 used sub-district as a cluster unit as it was the primary unit of the health system. In the pre-  
25  
26 135 intervention facility assessment, the percentage of healthcare facilities with at least one midwife  
27  
28 136 was 47% in Navrongo, 36% in Dodowa, and 21% in Kintampo.

29  
30  
31 137 We made 16 pairs of the clusters (Navrongo, 6; Kintampo 6; and Dodowa, 4), taking  
32  
33 138 into account the population, the volume of delivery, and the number of midwives in each  
34  
35 139 cluster. Then, we randomly assigned the clusters within a pair to the intervention or the control  
36  
37 140 groups. A data analyst who was not a member of the study team randomly allocated the paired  
38  
39 141 clusters using computer-generated random sequences. However, we assigned 3 clusters with a  
40  
41 142 district hospital to the intervention group as majority of the childbirths took place in these  
42  
43 143 hospitals. We informed about the implementation of the intervention to the community people  
44  
45 144 and healthcare providers in the intervention group only. However, complete blinding was not  
46  
47 145 feasible; we implemented the intervention in the intention-to-treat design, which did not control  
48  
49 146 for women's choice and access to healthcare facilities across a cluster boundary.

### 50 51 52 147 **Participants and intervention**

53  
54 148 Women who were aged between 15 – 49 years old, and delivered between October 1, 2014 and  
55  
56 149 September 30, 2015 in the intervention group were eligible for study enrolment.[26]  
57  
58  
59  
60

1  
2  
3  
4  
5 150 We implemented the intervention for 12 months (October 1, 2014 to September 30,  
6  
7 151 2015) as initially planned in the protocol. The details of the intervention were described  
8  
9 152 previously.[26] Women were enrolled to the intervention when they had contacts with  
10  
11 153 healthcare providers anytime from pregnancy to the postpartum period.  
12  
13

14 154 The intervention package was composed of 4 interventions. First, healthcare providers  
15  
16 155 underwent reorientation about CoC. Second, healthcare providers distributed the CoC card to  
17  
18 156 women, which contains the schedule and actual dates of contacts with healthcare providers,  
19  
20 157 information on essential care and birth preparedness, and the presence of danger signs.  
21  
22 158 Healthcare providers and women utilized the CoC card in every contact. Third, healthcare  
23  
24 159 providers retained women and their newborns in the healthcare facility for the first 24 hours  
25  
26 160 postpartum to provide the first PNC. Fourth, healthcare providers made home visits to provide  
27  
28 161 PNC to women and their newborns within the first 48 hours if they missed the first postnatal  
29  
30 162 contact by 24 hours postpartum.  
31  
32

33 163 We emphasized to implement the intervention using the existing health systems and  
34  
35 164 resource; all intervention facilities in the 3 sites had re-orientation of healthcare providers, and  
36  
37 165 implemented all or a part of the intervention package depending on availability of resource and  
38  
39 166 infrastructure. In addition, district health management teams conducted monthly supervision in  
40  
41 167 healthcare facilities, monitored the performance of the interventions, and had a monthly meeting  
42  
43 168 to report the progress and discuss the challenges in collaboration with research teams. In the  
44  
45 169 control group, women and their newborns received the standard care recommended by the  
46  
47 170 Ghana National Safe Motherhood Service Protocol.[27] During the trial period, we did not  
48  
49 171 observe any harms or unintended events in the intervention or the control groups.  
50

## 51 172 **Survey**

52  
53  
54 173 We conducted the baseline survey from July to September 2014, with a sample of 1,500 women  
55  
56 174 who delivered between September 1, 2012 and June 30, 2014, and the follow-up survey was  
57  
58 175 performed from October to December 2015, with a sample of 1,500 women who received care  
59  
60

1  
2  
3  
4  
5 176 during the intervention period. We calculated the required sample size based on an expected  
6  
7 177 increase in antenatal contacts from 86.6 to 95.0% according to the finding of our formative  
8  
9 178 study.[4] We considered a 95% confidence interval, 80% power, an intraclass correlation  
10  
11 179 coefficient of 0.02675, and 10% attrition in the sample size calculation.[26] We performed two-  
12  
13 180 stage random sampling to select 500 eligible women from each study site for the baseline and  
14  
15 181 follow-up surveys.

16  
17  
18 182 For the first stage, we defined sub-districts as a cluster unit. A sub-district is composed  
19  
20 183 of several administrative community units. We used the administrative community units as a  
21  
22 184 primary sampling unit, and randomly selected primary sampling units from each sub-district  
23  
24 185 that corresponded to the probability proportionate to the population. For the second stage, we  
25  
26 186 randomly selected 10 women per primary sampling unit.

27  
28  
29 187 Trained research assistants performed the survey by visiting the households of the  
30  
31 188 eligible women and conducting face-to-face interviews with women who had no knowledge  
32  
33 189 about the cluster allocation. The structured questionnaire included women's socio-demographic  
34  
35 190 characteristics; frequency and timing of contacts with healthcare providers; contents of care that  
36  
37 191 women and their newborn received during ANC, PPC, and PNC; and whether they received the  
38  
39 192 CoC card. The frequency and timing of contacts and contents of care corresponded to the  
40  
41 193 recommendation of the Ghana National Safe Motherhood Service Protocol.[27]

#### 42 43 194 **Main outcome measures**

44  
45 195 We defined adequate contacts based on the frequency and timing of contacts with  
46  
47 196 healthcare providers as follows: at least 4 contacts with healthcare providers during pregnancy,  
48  
49 197 delivery with assistance of skilled healthcare providers at a healthcare facility, and 3 contacts  
50  
51 198 with healthcare providers within 48 hours, at 1 week (3-10 days), and at 6 weeks (36-48 days)  
52  
53 199 postpartum (Table 1).

54  
55  
56 200 We measured the quality of care based on the contents of care received by the women  
57  
58 201 and their newborns during ANC, PPC, and PNC (Table 1). The process-of-care dimension in  
59  
60

1  
2  
3  
4  
5 202 Donabedian's framework was employed.[7] We created quality of care indexes that consisted of  
6  
7 203 6 care items for ANC, 3 for PPC, and 14 for PNC. High-quality care was defined as receiving  
8  
9 204 all care items during ANC, PPC, and PNC.

11 205 Having adequate contacts with healthcare providers and high-quality care was  
12  
13 206 considered as the primary study outcome. The variable was composed of 3 categories:  
14  
15 207 inadequate contacts regardless of care quality, adequate contacts with low-quality care, and  
16  
17 208 adequate contacts with high-quality care. (i.e., quality-adjusted adequate contacts).

19  
20 209  
21  
22  
23  
24  
25  
26  
27  
28  
29  
30  
31  
32  
33  
34  
35  
36  
37  
38  
39  
40  
41  
42  
43  
44  
45  
46  
47  
48  
49  
50  
51  
52  
53  
54  
55  
56  
57  
58  
59  
60

210 Table 1 Definitions of the study outcome

| Stage                 | Contacts with healthcare providers                                                              | Contents of care                                                                                                                                                                                                                                                                                                                                                                                                                                                                                   | Primary outcome                                                                                                                                                                                                                                                                                  |
|-----------------------|-------------------------------------------------------------------------------------------------|----------------------------------------------------------------------------------------------------------------------------------------------------------------------------------------------------------------------------------------------------------------------------------------------------------------------------------------------------------------------------------------------------------------------------------------------------------------------------------------------------|--------------------------------------------------------------------------------------------------------------------------------------------------------------------------------------------------------------------------------------------------------------------------------------------------|
| Antenatal care (ANC)  | At least 4 contacts                                                                             | 6 care items:<br>(1) HIV test<br>(2) Hemoglobin test $\geq 2$<br>(3) Tetanus toxoid vaccination $\geq 2$<br>(4) Intermittent preventive treatment for malaria $\geq 3$<br>(5) Blood group and Rhesus factor test<br>(6) Blood pressure assessment $\geq 4$                                                                                                                                                                                                                                         | (i) Inadequate contacts: $\leq 3$ contacts<br>(ii) Adequate contacts with low-quality care: $\geq 4$ contacts with $\leq 5$ care items<br>(iii) Adequate contacts with high-quality care (i.e., quality-adjusted adequate contacts): $\geq 4$ contacts with 6 care items                         |
| Peripartum care (PPC) | Skilled facility-based delivery (SFD)                                                           | 3 care items:<br>(1) Dried newborn's body<br>(2) Skin-to-skin contact<br>(3) Initiation of breastfeeding $\leq 30$ minutes                                                                                                                                                                                                                                                                                                                                                                         | (i) Inadequate contact: Non-SFD<br>(ii) Adequate contact with low-quality care: SFD with $\leq 2$ care items<br>(iii) Adequate contact with high-quality care (i.e., quality-adjusted adequate contact): SFD with 3 care items                                                                   |
| Postnatal care (PNC)  | 3 contacts with timeliness:<br>First: $\leq 48$ hours<br>Second: 3-10 days<br>Third: 36-48 days | 14 care items:<br>Mother:<br>(1) Temperature measurement<br>(2) Blood pressure assessment<br>(3) Bleeding check<br>(4) Breastfeeding problem check<br>(5) Hemoglobin assessment<br>(6) Fundal height assessment<br>(7) Perineum/Lochia check<br>(8) Vitamin A supplement;<br>Newborn:<br>(9) General physical examination<br>(10) BCG immunization<br>(11) Oral polio vaccine (OPV)<br>(12) Umbilical cord bleeding check<br>(13) Temperature measurement<br>(14) Breastfeeding difficulties check | (i) Inadequate contact: $\leq 2$ contacts or non-timely contacts<br>(ii) Adequate contacts with low-quality care: 3 timely contacts with $\leq 13$ care items<br>(iii) Adequate contacts with high-quality care (i.e., quality-adjusted adequate contacts): 3 timely contacts with 14 care items |

211

## 212 **Confounders**

213 We considered the following variables as potential confounders: study site, living in a sub-  
214 district with a district hospital, age, education, marital status, parity, religion, wealth quintile  
215 index, and the status of national health insurance membership. Of these variables, age and parity  
216 were initially continuous variables, and converted to categorical variables: age ( $\leq 19$ , 20-34, and  
217  $\geq 35-49$ ), parity (primipara and multipara). The variable of wealth quintile index was generated  
218 by performing principal component analysis of 13 household assets.

## 219 **Statistical analysis**

220 We calculated the distributions of the basic characteristics of the women, the percentage of each  
221 care item received by women and their newborns, and the percentage of having adequate  
222 contacts with healthcare providers and high-quality care. We evaluated the effect of the  
223 intervention on adequate contacts with high-quality care during ANC, PPC, and PNC. However,  
224 the effect of the intervention could be biased because of imbalanced cluster allocation; the effect  
225 could appear greater as 3 clusters with district hospitals were assigned to the intervention group.  
226 Moreover, women in the control group could access district hospitals in the intervention area,  
227 which in turn lead to a potential contamination that could make the effect of the intervention  
228 smaller. Thus, to control for these potential biases, we utilized the difference-in-difference  
229 (DiD) method with 4 groups including the intervention (n=863) and control (n=617) groups in  
230 the baseline survey and the intervention (n=870) and control (n=602) groups in the follow-up  
231 survey. Before performing the DiD analysis, we assessed two assumptions. First, no time-  
232 varying difference existed between the intervention and the control groups.[28] We did not  
233 observe any specific changes that might have affected the study outcome in both groups during  
234 the trial period. Second, the outcome trend should be equal in the intervention and the control  
235 groups in the absence of the trial.[28] However, it was not feasible to measure the change that  
236 could have occurred in the intervention group in the absence of the intervention because we did  
237 not conduct any surveys before the baseline survey. Therefore, we performed the DiD analysis



1  
2  
3  
4  
5 238 with cluster robust estimators of variance, controlling for individual characteristics. Robust  
6  
7 239 estimators of variance is a technique used to estimate cluster robust standard errors and adjust  
8  
9 240 the confidence intervals of the DiD estimators when the regression model is potentially affected  
10  
11 241 by cluster correlations.[29]

12  
13  
14 242 We also considered the potential effect of contaminations. Therefore, we calculated  
15  
16 243 DiD estimators in the intention-to-treat and per-protocol designs separately. The intention-to-  
17  
18 244 treat design focuses whether the intervention works in the real world setting, which shows  
19  
20 245 effectiveness of the intervention.[30] In the intention-to-treat analysis, we compared the  
21  
22 246 percentages of the study outcomes between the intervention and the control groups  
23  
24 247 corresponded to the initial cluster allocation. The results could be affected by coverage and  
25  
26 248 contamination of the intervention. The per-protocol design focuses whether the intervention  
27  
28 249 works in the ideal setting, which shows the efficacy of the intervention.[30] In the per-protocol  
29  
30 250 analysis, we treated the possession of the CoC card as actual participation in the intervention.  
31  
32 251 Thus, women in the intervention group who did not receive the CoC card and women in the  
33  
34 252 control group who received the CoC card were excluded from the DiD analysis.

35  
36  
37 253 Finally, we performed sub-group analyses to identify factors associated with having  
38  
39 254 adequate contacts with high-quality care among women in the intervention group in the follow-  
40  
41 255 up survey (n=870). This analysis focused on identifying the characteristics of women who had  
42  
43 256 greater chances of having adequate contacts with high-quality care in the intervention area. We  
44  
45 257 used multivariable logistic regression with cluster robust standard errors. The independent  
46  
47 258 variables were study site, living in a sub-district with a district hospital, age, education, marital  
48  
49 259 status, parity, religion, wealth quintiles, and the status of national health insurance membership.  
50  
51 260 We used Stata 13 (College Station, TX: Stata Corp LP) for the analyses.

## 52 261 **Participants and Public involvement**

53  
54  
55 262 Participants and public were not involved in the design of, the recruitment to, and conduct of the  
56  
57 263 study because this was a randomized controlled trial. However, community people in the  
58  
59  
60

264 intervention group were announced about the EMBRACE project at the commencement of the  
265 trial.

### 266 **Ethical approval**

267 We obtained ethical approvals from Ghana Health Service, Navrongo HRC, Kintampo HRC,  
268 Dodowa HRC, and The University of Tokyo. Consent was obtained from the local health  
269 authorities and community leaders prior to conducting the intervention study. We obtained oral  
270 informed consent from participants of the intervention, whereas we obtained written informed  
271 consent from participants of the surveys. For those who were aged under 18, we requested  
272 permission from their guardians and obtained their signature on the consent form.

### 273 **RESULTS**

274 We analyzed the baseline survey data of 1,480 women and the follow-up survey data of 1,490  
275 women. The baseline survey dataset included 617 women (41.7%) in the control group and 863  
276 women (58.3%) in the intervention group. The follow-up survey dataset included 620 (41.6%)  
277 in the control group and 870 (58.4%) in the intervention group. We excluded the data of 10  
278 women from the baseline survey because they did not meet the inclusion criteria. Additionally,  
279 we excluded 10 women from the primary sampling unit at baseline and another 10 women from  
280 the primary sampling unit of the follow-up survey.

281 Table 2 shows the distributions of the basic characteristics of the women. The  
282 intervention group had more Muslim and wealthy women than the control group.

283 Table 2 Basic characteristics of women (n=2970)

|                   | Baseline<br>(n=1,480) |        |                         |        | p    | Follow-up<br>(n=1,490) |        |                         |        | p    |
|-------------------|-----------------------|--------|-------------------------|--------|------|------------------------|--------|-------------------------|--------|------|
|                   | Control<br>(n=617)    |        | Intervention<br>(n=863) |        |      | Control<br>(n=620)     |        | Intervention<br>(n=870) |        |      |
|                   | n                     | (%)    | n                       | (%)    |      | n                      | (%)    | n                       | (%)    |      |
| <b>Study site</b> |                       |        |                         |        | 0.43 |                        |        |                         |        | 0.40 |
| Navrongo          | 220                   | (35.7) | 280                     | (32.4) |      | 220                    | (35.5) | 280                     | (32.2) |      |
| Kintampo          | 198                   | (32.1) | 288                     | (33.4) |      | 200                    | (32.3) | 290                     | (33.3) |      |

|                                                          |     |        |     |        |       |     |        |     |        |       |
|----------------------------------------------------------|-----|--------|-----|--------|-------|-----|--------|-----|--------|-------|
| Dodowa                                                   | 199 | (32.3) | 295 | (34.2) |       | 200 | (32.3) | 300 | (34.5) |       |
| <b>Living in a sub-district with a district hospital</b> |     |        |     |        | <0.01 |     |        |     |        | <0.01 |
| Yes                                                      | 70  | (11.4) | 328 | (38.0) |       | 70  | (11.3) | 340 | (39.1) |       |
| No                                                       | 547 | (88.7) | 535 | (62.0) |       | 550 | (88.7) | 530 | (60.9) |       |
| <b>Age</b>                                               |     |        |     |        | 0.83  |     |        |     |        | 0.93  |
| ≤19                                                      | 35  | (5.7)  | 53  | (6.1)  |       | 92  | (14.8) | 130 | (14.9) |       |
| 20-34                                                    | 452 | (73.3) | 638 | (73.9) |       | 439 | (70.8) | 621 | (71.4) |       |
| 35-49                                                    | 130 | (21.1) | 172 | (19.9) |       | 89  | (14.4) | 119 | (13.7) |       |
| <b>Education</b>                                         |     |        |     |        | 0.77  |     |        |     |        | 0.12  |
| Did not complete primary                                 | 178 | (28.9) | 257 | (29.8) |       | 145 | (23.4) | 182 | (20.9) |       |
| Completed primary                                        | 170 | (27.6) | 222 | (25.7) |       | 196 | (31.6) | 242 | (27.8) |       |
| Completed secondary                                      | 209 | (33.9) | 289 | (33.5) |       | 207 | (33.4) | 326 | (37.5) |       |
| Complete tertiary                                        | 60  | (9.7)  | 95  | (11.0) |       | 72  | (11.6) | 120 | (13.8) |       |
| <b>Marital status</b>                                    |     |        |     |        | 0.12  |     |        |     |        | 0.32  |
| Married                                                  | 415 | (67.3) | 542 | (62.8) |       | 351 | (56.6) | 470 | (54.0) |       |
| Cohabiting                                               | 150 | (24.3) | 224 | (26.0) |       | 163 | (26.3) | 260 | (29.9) |       |
| Other                                                    | 52  | (8.4)  | 97  | (11.2) |       | 106 | (17.1) | 140 | (16.1) |       |
| <b>Parity</b>                                            |     |        |     |        | 0.37  |     |        |     |        | 0.09  |
| Primipara                                                | 128 | (20.8) | 196 | (22.7) |       | 187 | (30.2) | 299 | (34.4) |       |
| Multipara                                                | 489 | (79.3) | 667 | (77.3) |       | 433 | (69.8) | 571 | (65.6) |       |
| <b>Religion</b>                                          |     |        |     |        | <0.01 |     |        |     |        | <0.01 |
| Christian                                                | 524 | (84.9) | 656 | (76.0) |       | 533 | (86.0) | 682 | (78.4) |       |
| Muslim                                                   | 51  | (8.3)  | 150 | (17.4) |       | 65  | (10.5) | 145 | (16.7) |       |
| Others                                                   | 42  | (6.8)  | 57  | (6.6)  |       | 22  | (3.6)  | 43  | (4.9)  |       |
| <b>Wealth quintiles</b>                                  |     |        |     |        | <0.01 |     |        |     |        | <0.01 |
| Lowest                                                   | 144 | (23.3) | 156 | (18.1) |       | 171 | (27.6) | 188 | (21.6) |       |
| Lower                                                    | 141 | (22.9) | 155 | (18.0) |       | 132 | (21.3) | 112 | (12.9) |       |
| Middle                                                   | 104 | (16.9) | 196 | (22.7) |       | 118 | (19.0) | 174 | (20.0) |       |
| Higher                                                   | 120 | (19.5) | 169 | (19.6) |       | 106 | (17.1) | 192 | (22.1) |       |
| Highest                                                  | 108 | (17.5) | 187 | (21.7) |       | 93  | (15.0) | 204 | (23.5) |       |
| <b>National health insurance</b>                         |     |        |     |        | 0.21  |     |        |     |        | 0.06  |
| Covered                                                  | 344 | (55.8) | 510 | (59.1) |       | 407 | (65.7) | 611 | (70.2) |       |
| Not covered                                              | 272 | (44.2) | 353 | (40.9) |       | 213 | (34.4) | 259 | (29.8) |       |

284 p, p-value for chi-squared test.

285 Table 3 shows the contents of care received by the women and their newborns during  
 286 ANC, PPC, and PNC. After the intervention, 12.6% of women in the intervention group  
 287 received all 6 items during ANC, 33.6% received all 3 items during PPC, and 41.5% of women  
 288 and their newborns received all 14 items during PNC. The adjusted DiD estimators showed no

1  
2  
3  
4  
5  
6 289 significant changes across the three phases: 2.2 (p=0.61) at ANC, 2.3 (p=0.69) at PPC, and 8.1  
7  
8 290 (p=0.35) at PNC. Among the 4 ANC care items which reception were recorded in the CoC card,  
9  
10 291 blood group testing increased from 49.9% to 79.5% in the intervention group. The reception of  
11  
12 292 other care items in the intervention group remained low even after the intervention: hemoglobin  
13  
14 293 tests (40.9%), intermittent preventive treatment for malaria (43.7%), and tetanus toxoid  
15  
16 294 vaccination (46.4%). During the peripartum period, only 47.0% in the intervention group of the  
17  
18 295 follow-up survey initiated breastfeeding within the first 30 minutes. During PNC, over 60% of  
19  
20 296 women and their newborns in the intervention group of the follow-up survey received each care  
21  
22 297 item.

23  
24  
25 298  
26  
27  
28  
29  
30  
31  
32  
33  
34  
35  
36  
37  
38  
39  
40  
41  
42  
43  
44  
45  
46  
47  
48  
49  
50  
51  
52  
53  
54  
55  
56  
57  
58  
59  
60

299 Table 3 Content of ANC, PPC, and PNC (n=2,970)

|                                                       | Baseline                |                              | Follow-up               |                              | cDiD | p    | aDiD | p    |
|-------------------------------------------------------|-------------------------|------------------------------|-------------------------|------------------------------|------|------|------|------|
|                                                       | Control<br>(n=617)<br>% | Intervention<br>(n=863)<br>% | Control<br>(n=620)<br>% | Intervention<br>(n=870)<br>% |      |      |      |      |
| <b>ANC</b>                                            |                         |                              |                         |                              |      |      |      |      |
| <b>All 6 care items received</b>                      | 5.7                     | 4.9                          | 10.7                    | 12.6                         | 2.8  | 0.52 | 2.2  | 0.61 |
| Blood group and Rhesus factor test                    | 52.8                    | 49.9                         | 67.9                    | 79.5                         | -    | -    | -    | -    |
| HIV test                                              | 59.0                    | 55.6                         | 79.7                    | 77.6                         | -    | -    | -    | -    |
| Blood pressure assessment 4 times                     | 55.3                    | 51.5                         | 71.5                    | 72.4                         | -    | -    | -    | -    |
| Tetanus toxoid vaccination 2 doses                    | 40.8                    | 39.3                         | 55.3                    | 46.4                         | -    | -    | -    | -    |
| Intermittent preventive treatment for malaria 3 doses | 40.4                    | 36.3                         | 44.2                    | 43.7                         | -    | -    | -    | -    |
| Hemoglobin test 2 times                               | 28.9                    | 26.4                         | 35.8                    | 40.9                         | -    | -    | -    | -    |
| <b>PPC</b>                                            |                         |                              |                         |                              |      |      |      |      |
| <b>All 3 care items received</b>                      | 24.3                    | 23.8                         | 31.8                    | 33.6                         | 2.3  | 0.70 | 2.3  | 0.69 |
| Dried newborn's body                                  | 87.8                    | 90.0                         | 94.2                    | 93.3                         | -    | -    | -    | -    |
| Skin-to-skin contact                                  | 47.8                    | 45.9                         | 58.9                    | 60.7                         | -    | -    | -    | -    |
| Initiation of breastfeeding $\leq 30$ minutes         | 44.9                    | 38.9                         | 46.3                    | 47.0                         | -    | -    | -    | -    |
| <b>PNC</b>                                            |                         |                              |                         |                              |      |      |      |      |
| <b>All 14 care items received</b>                     | 10.2                    | 11.5                         | 31.8                    | 41.5                         | 8.5  | 0.34 | 8.1  | 0.35 |
| <b>Mother</b>                                         |                         |                              |                         |                              |      |      |      |      |
| <b>All 8 maternal care items received</b>             | 21.2                    | 22.5                         | 35.2                    | 47.7                         | 11.3 | 0.12 | 10.9 | 0.14 |
| Temperature measurement                               | 65.5                    | 65.2                         | 69.4                    | 78.1                         | -    | -    | -    | -    |
| Blood pressure assessment                             | 50.2                    | 47.3                         | 69.5                    | 76.8                         | -    | -    | -    | -    |
| Bleeding check                                        | 52.7                    | 58.5                         | 69.2                    | 73.3                         | -    | -    | -    | -    |
| Breastfeeding problem check                           | 46.4                    | 52.4                         | 66.8                    | 72.0                         | -    | -    | -    | -    |
| Vitamin A supplement                                  | 59.0                    | 57.7                         | 58.9                    | 68.4                         | -    | -    | -    | -    |
| Fundal height measurement                             | 49.6                    | 51.3                         | 55.0                    | 64.3                         | -    | -    | -    | -    |
| Perineum/lochia check                                 | 47.5                    | 53.4                         | 57.6                    | 63.2                         | -    | -    | -    | -    |
| Hemoglobin assessment                                 | 48.5                    | 48.9                         | 51.1                    | 61.7                         | -    | -    | -    | -    |
| <b>Newborns</b>                                       |                         |                              |                         |                              |      |      |      |      |
| <b>All 6 newborn care items received</b>              | 13.1                    | 20.3                         | 52.6                    | 58.2                         | -1.6 | 0.87 | -2.1 | 0.82 |
| General physical examination                          | 71.8                    | 69.0                         | 74.8                    | 77.9                         | -    | -    | -    | -    |
| Temperature measurement                               | 16.1                    | 24.8                         | 71.3                    | 76.0                         | -    | -    | -    | -    |
| Breastfeeding difficulties check                      | 47.5                    | 57.0                         | 71.0                    | 73.8                         | -    | -    | -    | -    |
| Umbilical cord bleeding check                         | 49.0                    | 57.5                         | 71.5                    | 73.3                         | -    | -    | -    | -    |
| OPV                                                   | 66.8                    | 60.1                         | 66.5                    | 68.4                         | -    | -    | -    | -    |
| BCG immunization                                      | 63.4                    | 60.5                         | 60.0                    | 64.3                         | -    | -    | -    | -    |

300

1  
2  
3  
4  
5 301 Note: cDiD, crude difference-in-difference estimators; p, p-values for DiD estimators; aDiD,  
6  
7 302 adjusted difference-in-difference estimators. The DiD estimates were adjusted for study site,  
8  
9 303 living in a sub-district with district hospital, age, education level, marital status, parity, religion,  
10  
11 304 wealth quintiles, and the status of the national health insurance membership.

12  
13  
14 305 Table 4 shows the effect of the intervention on adequate contacts with high-quality care.  
15  
16 306 For the per-protocol analysis, we excluded 238 women in the intervention group who did not  
17  
18 307 receive a CoC card and 134 women in the control group who received a CoC card. During  
19  
20 308 ANC, 12.6% of women in the intervention group in the follow-up survey had adequate contacts  
21  
22 309 with high-quality care. The adjusted DiD estimators for adequate contacts with high-quality care  
23  
24 310 during ANC were 2.2 ( $p=0.61$ ) in the intention-to-treat design, and 2.8 ( $p=0.54$ ) in the per-  
25  
26 311 protocol design. During PPC, 31.5% of women in the intervention group in the follow-up  
27  
28 312 survey had adequate contacts with high-quality care. The adjusted DiD estimators for adequate  
29  
30 313 contact with high-quality care during PPC were 1.9 ( $p=0.73$ ) in the intention-to-treat design and  
31  
32 314 2.7 ( $p=0.66$ ) in the per-protocol design. During PNC, 33.7% of women in the intervention group  
33  
34 315 in the follow-up survey had adequate contacts with high-quality care. The adjusted DiD  
35  
36 316 estimators for adequate contact with high-quality care during PNC were 12.3 ( $p=0.13$ ) in the  
37  
38 317 intention-to-treat design and 18.1 ( $p=0.02$ ) in the per-protocol design. Additionally, Table 4  
39  
40 318 shows the gap between adequate contacts (i.e., adequate contacts with high- or low-quality care)  
41  
42 319 and quality-adjusted adequate contacts (i.e., adequate contacts with high-quality care). In the  
43  
44 320 intention-to-treat design, 76.9% of women in the intervention group in the follow-up survey had  
45  
46 321 adequate contacts during ANC; however, only 12.6% had quality-adjusted adequate contacts.  
47  
48 322 Moreover, 82.0% delivered with the assistance of a skilled birth attendant at a healthcare  
49  
50 323 facility, while only 31.5% had a skilled delivery with high-quality care. During PNC, 62.2% of  
51  
52 324 women had adequate contacts. However, only 33.7% had quality-adjusted adequate contacts.  
53  
54  
55  
56  
57  
58  
59  
60

325 Table 4 Effect of intervention on having adequate contacts with high-quality care (n=2,970)

|                                                | Baseline           |                         | Follow-up:<br>Intention-to-treat |                         |      |      | Follow-up:<br>Per-protocol |      |                    |                         |      |      |      |      |   |
|------------------------------------------------|--------------------|-------------------------|----------------------------------|-------------------------|------|------|----------------------------|------|--------------------|-------------------------|------|------|------|------|---|
|                                                | Control<br>(n=617) | Intervention<br>(n=863) | Control<br>(n=620)               | Intervention<br>(n=870) | cDiD | p    | aDiD                       | p    | Control<br>(n=486) | Intervention<br>(n=632) | cDiD | p    | aDiD | p    |   |
|                                                | %                  | %                       | %                                | %                       |      |      |                            |      | %                  | %                       |      |      |      |      |   |
| <b>ANC</b>                                     |                    |                         |                                  |                         |      |      |                            |      |                    |                         |      |      |      |      |   |
| Inadequate contacts                            | 32.7               | 31.6                    | 22.7                             | 23.1                    | -    | -    | -                          | -    | 23.7               | 22.0                    | -    | -    | -    | -    | - |
| Adequate contacts<br>with low-quality care     | 61.6               | 63.5                    | 66.6                             | 64.3                    | -    | -    | -                          | -    | 66.5               | 65.0                    | -    | -    | -    | -    | - |
| Adequate contacts<br>with high-quality<br>care | 5.7                | 4.9                     | 10.7                             | 12.6                    | 2.8  | 0.52 | 2.2                        | 0.61 | 9.9                | 13.0                    | 3.9  | 0.43 | 2.8  | 0.54 |   |
| <b>PPC</b>                                     |                    |                         |                                  |                         |      |      |                            |      |                    |                         |      |      |      |      |   |
| Inadequate contact                             | 25.0               | 26.8                    | 20.0                             | 18.1                    | -    | -    | -                          | -    | 22.6               | 15.2                    | -    | -    | -    | -    | - |
| Adequate contact<br>with low-quality care      | 54.1               | 53.1                    | 49.8                             | 50.5                    | -    | -    | -                          | -    | 50.0               | 50.6                    | -    | -    | -    | -    | - |
| Adequate contact<br>with high-quality<br>care  | 20.9               | 20.2                    | 30.2                             | 31.5                    | 2.1  | 0.72 | 1.9                        | 0.73 | 27.4               | 34.2                    | 7.6  | 0.25 | 2.7  | 0.66 |   |
| <b>PNC</b>                                     |                    |                         |                                  |                         |      |      |                            |      |                    |                         |      |      |      |      |   |
| Inadequate contacts                            | 87.2               | 86.8                    | 45.3                             | 37.8                    | -    | -    | -                          | -    | 48.2               | 32.1                    | -    | -    | -    | -    | - |
| Adequate contacts<br>with low-quality care     | 9.9                | 11.9                    | 32.1                             | 28.5                    | -    | -    | -                          | -    | 32.9               | 29.8                    | -    | -    | -    | -    | - |
| Adequate contacts<br>with high-quality<br>care | 2.9                | 1.3                     | 22.6                             | 33.7                    | 12.7 | 0.14 | 12.3                       | 0.13 | 18.9               | 38.1                    | 20.8 | 0.01 | 18.1 | 0.02 |   |

326 Note: cDiD, crude difference-in-difference estimators; p, p-values for DiD estimators; aDiD, adjusted difference-in-difference estimators

327 The DiD estimates were adjusted for study site, living in a sub-district with a district hospital, age, education level, marital status, parity,

328 religion, wealth quintiles, and the status of the national health insurance membership.

1  
2  
3  
4 329 Table 5 shows variations in having adequate contacts with high-quality care according to the  
5  
6 330 characteristics of women in the intervention group in the follow-up survey (n=870). Women living  
7  
8 331 in Navrongo were more likely to have adequate contacts with high-quality care during PPC and  
9  
10 332 PNC than women living in Kintampo (AOR=0.27; 95% CI 0.12 to 0.63 at PPC, AOR=0.08; 95% CI  
11  
12 333 0.03 to 0.19 at PNC) and in Dodowa (AOR=0.20; 95% CI 0.10 to 0.41 at PPC; AOR=0.39; 95% CI  
13  
14 334 0.23 to 0.65 at PNC). During ANC, however, women living in Dodowa were more likely to have  
15  
16 335 adequate contacts with high-quality care (AOR=3.26; 95% CI 1.67 to 6.33) than those living in  
17  
18 336 Navrongo. Women with national health insurance membership were more likely to have adequate  
19  
20 337 contacts with high-quality care during ANC (AOR=1.78; 95% CI 1.14 to 2.77) and PNC  
21  
22 338 (AOR=1.46; 95% CI 1.07 to 2.00) than those without membership. During ANC, unmarried women  
23  
24 339 or women without cohabiting partners (i.e., single, divorced, separated or widowed) were less likely  
25  
26 340 to have adequate contact with high-quality care (AOR=0.40; 95%CI 0.17 to 0.94), whereas  
27  
28 341 multiparous women were more likely to have adequate contacts with high-quality care than  
29  
30 342 primiparous women (AOR=1.76, 95% CI 1.07 to 2.87). During PPC, women in the lower group in  
31  
32 343 the wealth quintiles were more likely to have adequate contacts with high-quality care, compared  
33  
34 344 with women in the lowest group in the wealth quintiles (AOR=1.80; 95% CI 1.14 to 2.83). During  
35  
36 345 PNC, teenage women were less likely to have adequate contacts with high-quality care than women  
37  
38 346 aged 20 to 34 years (AOR=0.48, 95%CI 0.24-0.95). Women who had completed secondary school  
39  
40 347 were less likely to have adequate contact with high-quality care compared to women who had never  
41  
42 348 completed primary school (AOR=0.64; 95%CI 0.44-0.93).

43  
44  
45  
46 349



350 Table 5 Factors associated with adequate contacts with high-quality care in the intervention group  
 351 of the follow-up survey (n=870)

|                                                          | ANC  |             | PPC  |             | PNC  |             |
|----------------------------------------------------------|------|-------------|------|-------------|------|-------------|
|                                                          | AOR  | (95%CI)     | AOR  | (95%CI)     | AOR  | (95%CI)     |
| <b>Study site</b>                                        |      |             |      |             |      |             |
| Navrongo                                                 | 1.00 |             | 1.00 |             | 1.00 |             |
| Kintampo                                                 | 0.80 | (0.41-1.57) | 0.27 | (0.12-0.63) | 0.08 | (0.03-0.19) |
| Dodowa                                                   | 3.26 | (1.67-6.33) | 0.20 | (0.10-0.41) | 0.39 | (0.23-0.65) |
| <b>Living in a sub-district with a district hospital</b> |      |             |      |             |      |             |
| Yes                                                      | 1.44 | (0.83-2.50) | 1.57 | (0.84-2.91) | 1.11 | (0.69-1.79) |
| No                                                       | 1.00 |             | 1.00 |             |      |             |
| <b>Age</b>                                               |      |             |      |             |      |             |
| ≤19                                                      | 0.81 | (0.28-2.35) | 0.75 | (0.39-1.42) | 0.48 | (0.24-0.95) |
| 20-34                                                    | 1.00 |             | 1.00 |             | 1.00 |             |
| 35-49                                                    | 0.69 | (0.46-1.03) | 1.00 | (0.65-1.54) | 0.79 | (0.46-1.37) |
| <b>Education</b>                                         |      |             |      |             |      |             |
| Did not complete primary                                 | 1.00 |             | 1.00 |             | 1.00 |             |
| Completed primary                                        | 1.09 | (0.55-2.18) | 1.26 | (0.76-2.08) | 0.73 | (0.50-1.06) |
| Completed secondary                                      | 1.65 | (0.76-3.56) | 1.18 | (0.71-1.98) | 0.64 | (0.44-0.93) |
| Complete tertiary                                        | 2.32 | (0.81-6.67) | 0.96 | (0.47-1.99) | 0.77 | (0.37-1.59) |
| <b>Marital status</b>                                    |      |             |      |             |      |             |
| Married                                                  | 1.00 |             | 1.00 |             | 1.00 |             |
| Cohabiting                                               | 0.85 | (0.55-1.29) | 0.78 | (0.51-1.20) | 1.03 | (0.58-1.82) |
| Other                                                    | 0.40 | (0.17-0.94) | 1.26 | (0.84-1.89) | 1.14 | (0.61-2.12) |
| <b>Parity</b>                                            |      |             |      |             |      |             |
| Primipara                                                | 1.00 |             | 1.00 |             | 1.00 |             |
| Multipara                                                | 1.76 | (1.07-2.87) | 1.21 | (0.79-1.86) | 0.75 | (0.41-1.39) |
| <b>Religion</b>                                          |      |             |      |             |      |             |
| Christian                                                | 1.00 |             | 1.00 |             | 1.00 |             |
| Muslim                                                   | 1.11 | (0.59-2.08) | 0.68 | (0.39-1.19) | 0.86 | (0.47-1.58) |
| Other                                                    | 0.50 | (0.06-3.91) | 1.63 | (0.92-2.90) | 1.87 | (0.83-4.25) |
| <b>Wealth index</b>                                      |      |             |      |             |      |             |
| Lowest                                                   | 1.00 |             | 1.00 |             | 1.00 |             |
| Lower                                                    | 0.62 | (0.23-1.69) | 1.80 | (1.14-2.83) | 1.19 | (0.80-1.76) |
| Middle                                                   | 0.70 | (0.27-1.80) | 1.41 | (0.83-2.42) | 0.89 | (0.53-1.48) |
| Higher                                                   | 1.59 | (0.68-3.75) | 1.48 | (0.85-2.60) | 1.21 | (0.68-2.15) |
| Highest                                                  | 1.40 | (0.61-3.21) | 1.28 | (0.70-2.33) | 1.98 | (1.00-3.92) |
| <b>National Health Insurance</b>                         |      |             |      |             |      |             |

|             |      |             |      |             |      |             |
|-------------|------|-------------|------|-------------|------|-------------|
| Covered     | 1.78 | (1.14-2.77) | 1.20 | (0.79-1.81) | 1.46 | (1.07-2.00) |
| Not covered | 1.00 |             | 1.00 |             | 1.00 |             |

352 Note: AOR, adjusted odds ratios by multivariable logistic regression analyses with cluster robust  
 353 standard errors

## 354 **DISCUSSION**

355 A 12-month implementation of the intervention showed significant effects on high-quality care  
 356 during regular contacts with healthcare providers at PNC in the per-protocol design. In the  
 357 intention-to-treat design, however, the intervention showed no significant effects during ANC, PPC,  
 358 and PNC. In addition, a large gap remained between the crude adequate contacts and quality-  
 359 adjusted adequate contacts. Hence, despite strengthening regular contacts with healthcare providers  
 360 through the intervention, women and their newborns did not receive high-quality care. Furthermore,  
 361 a chance to have adequate contacts and receive high-quality care varied among women with  
 362 different socio-demographic backgrounds (i.e. study site, and membership of national health  
 363 insurance) in the intervention group.

364 The results showed the intervention was efficacious in increasing postnatal contacts and  
 365 receiving high-quality care among those who actually received the intervention, but did not provide  
 366 evidence of the effectiveness. Before implementing the intervention, we found that the women were  
 367 not aware of the importance of PNC, and they believed in a local custom that women and their  
 368 newborns should stay at home for 6 weeks postpartum. As other intervention studies focused,[31,  
 369 32] this intervention was designed to improve women's care seeking behavior and healthcare'  
 370 provider's knowledge. Using the CoC card, women learned the importance and timings of PNC  
 371 during ANC, and were given specific appointments for PNC visits. Healthcare providers received a  
 372 three-day training course and a monthly supervision from the district health management team. The  
 373 result indicates that the intervention was efficacious, but did not reach all women equally.

1  
2  
3  
4 374 The intervention showed no significant effect on ANC. Only 12.6% of women in the  
5  
6 375 intervention group had adequate contacts and received high-quality care. Low coverage of  
7  
8 376 hemoglobin assessment, tetanus toxoid vaccination, and intermittent preventive treatment for  
9  
10 377 malaria could result in low-quality care during ANC. During the intervention, we addressed these  
11  
12 378 challenges by tracking the reception of these care items and blood group test using the CoC card.  
13  
14 379 After the intervention, blood group testing significantly increased, whereas other care items did not  
15  
16 380 change significantly. One possible explanation was that pregnant women could not receive those  
17  
18 381 care items multiple times according to the national guidelines. The percentage of women who had  
19  
20 382 adequate contacts with high-quality care during ANC was higher in Dodowa (23.7%) than in  
21  
22 383 Navrongo (9.3%) and Kintampo (4.5%). A potential explanation is that Dodowa had better  
23  
24 384 governance and was able to procure the essential drugs and equipment for ANC without facing  
25  
26 385 stock-outs as Dodowa is a part of the Greater Accra region.

27  
28  
29 386 During PPC, the intervention did not show significant effect of the intervention on adequate  
30  
31 387 contact with high-quality care. Although over 80% of women had adequate contact (i.e. facility-  
32  
33 388 based skilled delivery) in the intervention group during the follow-up survey, only 60% of the  
34  
35 389 women had skin-to-skin contact, and 47% initiated breastfeeding within 30 minutes after delivery.  
36  
37 390 Poor practice of these basic newborn care might result in a large gap between adequate contact and  
38  
39 391 quality-adjusted contact in PPC. These newborn care do not require any equipment or technical  
40  
41 392 skills and should be practiced at any PPC settings even in the absence of midwives.

42  
43  
44 393 Women living in Navrongo were more likely to have adequate contacts with healthcare  
45  
46 394 providers and receive high-quality care during PPC and PNC than those living in Kintampo and  
47  
48 395 Dodowa. This implies that the intervention package works effectively through the advanced  
49  
50 396 primary health systems in Navrongo. In Ghana, CHPS initiatives developed a community-based  
51  
52 397 primary health system.[19] The initiatives was first introduced in Navrongo in 1994, and scaled-up

1  
2  
3  
4 398 across the country.[19] However, the community-based health systems remain underdeveloped in  
5  
6 399 most parts of the country, including Dodowa and Kintampo. Unequal assignment of midwives  
7  
8 400 among the 3 study sites was a typical example, which could affect the availability and quality of  
9  
10 401 maternal and newborn care. The intervention package could work more effectively in improved  
11  
12 402 health systems.

13  
14 403 Women covered by the national health insurance were more likely to have adequate  
15  
16 404 contacts and receive high-quality care during ANC and PNC, whereas unmarried women, women  
17  
18 405 without cohabiting partners, or teenage women were less likely to have adequate contacts with  
19  
20 406 high-quality care during ANC or PNC. This highlights the importance of the national health  
21  
22 407 insurance for women with low socio-economic status to receive essential care. However, only 63%  
23  
24 408 of the women in this study had insurance membership. The evidence presented in this study would  
25  
26 409 be useful in advocating for the enrollment of more pregnant women in the national health insurance  
27  
28 410 scheme.

### 31 411 **Limitations**

32  
33 412 This study has several limitations. First, the clusters in the study were not homogeneous and cluster  
34  
35 413 allocation was uneven. This might have impacted the effects of the intervention. The  
36  
37 414 implementation in the intention-to-treat design allowed women to choose and utilize any healthcare  
38  
39 415 facilities across the clusters, which could also influence the effect of the intervention. Second, the  
40  
41 416 study sites had been exposed to various research projects.[33-36] The effects of our intervention  
42  
43 417 could be built on the effects of previous projects. Third, no standardized measurements for the  
44  
45 418 quality of ANC, PPC, and PNC are available. Each quality of care index consists of different  
46  
47 419 number of items. Moreover, although the value of each item was not equal, we treated all items with  
48  
49 420 an equal weight. Thus, comparing the quality of care among ANC, PPC, and PNC would not be  
50  
51 421 appropriate.

## 422 **CONCLUSION**

423 The intervention package for strengthening the continuum of care showed a significant effect on  
424 contacts with healthcare providers and the quality of care in PNC, but not in ANC and PPC.  
425 Women and their newborns did not receive high-quality care during the regular contacts with  
426 healthcare providers. The intervention package could work more effectively under a well-developed  
427 community-based health systems and with broader national health insurance coverage. Ensuring  
428 regular contacts with healthcare providers and improving quality of care are both vital in promoting  
429 maternal and newborn health in Ghana.

## 430 **Funding**

431 This paper was funded by the Japan International Cooperation Agency (JICA) Human Development  
432 Department, and JICA Research Institute (<http://www.jica.go.jp/english/index.html>). The funders  
433 had no role in study design, data collection and analysis, decision to publish, or preparation of the  
434 manuscript.

## 435 **Competing interests**

436 All authors received the grant from Human Development Division, Japan International Cooperation  
437 Agency for implementing and evaluating this trial; no financial relationships with any organizations  
438 that might have an interest in this work in the previous 4 years; no other relationships or activities  
439 that could appear to have influenced this work.

## 440 **Authors' contribution**

441 SO, MG, AS, KK, FY, CT, SA, KN, ARO, SOA, EA, GQA, JY, AH, and MJ conceived and  
442 designed the study. SO, MG, FY, CT, SA, ARO, and SOA conducted interventions and collected  
443 data. SO analyzed, interpreted the data, and drafted manuscript. SO, HHL, AS, KK, EA, AH, and

1  
2  
3  
4 444 MJ interpreted data. SO, MG, HHL, AS and MJ contributed to the revision of manuscript. AH and  
5  
6 445 MJ are the study guarantor. All authors approved the final version of the manuscript.  
7  
8

9 446 **Patient consent**

10  
11 447 The study was approved by the Ethics Review Committee of Ghana Health Service, the Institutional  
12  
13 448 Review Boards of Dodowa HRC and Navrongo HRC, the Institutional Ethics Committee of  
14  
15 449 Kintampo HRC in Ghana, and the Research Ethics Committee of the University of Tokyo in Japan.  
16  
17 450 At the enrolment of the baseline and follow-up surveys, we obtained written informed consent from  
18  
19 451 the women. If the women were under the age of 18, we requested permission from their guardians  
20  
21 452 and obtained their signature on the consent form. At the study enrolment, we obtained oral informed  
22  
23 453 consent from the women to receive the interventions. The study protocol was registered in the  
24  
25 454 ISRCTN Registry (90618993).  
26  
27  
28

29 455 **Data sharing**

30  
31 456 The datasets used and/or analyzed during the current study are available on reasonable request from  
32  
33 457 the corresponding author (MJ) under permission by all relevant ethics committees.  
34  
35

36 458 **Acknowledgements**

37  
38 459 The authors thank the Ministry of Foreign Affairs in Japan and the Ministry of Health in Ghana. We  
39  
40 460 also express our gratitude to the Ghana Health Service and the District Health Management Teams  
41  
42 461 of the Shai-Osudoku, Ningo-Prampram, Kintampo North, Kintampo South, Kassena Nankana East,  
43  
44 462 and Kassena Nankana West for their support and cooperation to this study.  
45  
46

47 463 The Ghana EMBRACE Implementation Research Project was conducted by the Government of the  
48  
49 464 Republic of Ghana, Japan International Cooperation Agency (JICA) Human Development  
50  
51 465 Department, and JICA Research Institute with a coordinating support from the System Science  
52  
53 466 Consultancy Inc.  
54  
55  
56  
57  
58  
59  
60

1  
2  
3  
4 467 The content is solely the responsibility of the authors and does not necessarily represent the official  
5  
6 468 views of JICA Human Development Department, JICA Research Institute, and Ghana Health  
7  
8 469 Service. The System Science Consultants Inc. was a research coordinating team member of the  
9  
10 470 study. It does not have any funding role on the study, and their activities have no influence on the  
11  
12 471 study's outcomes.

14 472 The Ghana EMBRACE Implementation Research Project Team Authors:

16 473 Project Director: Yoshiharu Yoneyama

18 474 Project Manager: Ebenezer Appiah-Denkyira

20 475 Principal Investigator: Masamine Jimba

22 476 Co-principal Investigator: Abraham Hodgson

24 477 Research Members: Gloria Quansah Asare, Evelyn Ansah; Junko Yasuoka, Keiko Nanishi, Akira

26 478 Shibanuma, Kimiyo Kikuchi, Sumiyo Okawa; Margaret Gyapong, Sheila Addei, Vida Kukula,

28 479 Doris Sarpong, Clement Narh; Seth Owusu-Agyei, Kwaku Poku-Asante, Charlotte Tawiah, Yeetey

30 480 Enuameh, Kwame Adjei, Emmanuel Mahama; Abraham Oduro, John Williams, Cornelius

32 481 Debpuur, Francis Yeji, Evelyn Sakeah, Peter Wontuo; Akiko Hagiwara, Sakiko Shiratori; Yusuke

34 482 Kamiya.

36 483 We would also like to thank Professor Ana Langer, Associate Professor Margaret E. Kruk,

38 484 Professor Michael Reich, and Lecturer Jesse B. Bump, the Department of Global Health and

40 485 Population, Harvard T. H. Chan School of Public Health, for their technical advice. We also thank

42 486 the Takemi Program in International Health, Harvard T. H. Chan School of Public Health, and

44 487 Japan Medical Associations for their support.

46 488

489 **REFERENCES**

- 490 1. Lawn JE, Blencowe H, Oza S, *et al.* Every Newborn: progress, priorities, and potential beyond  
491 survival. *Lancet* 2014;384(9938):189-205.
- 492 2. Ronsmans C, Graham WJ. Maternal mortality: who, when, where, and why. *Lancet*  
493 2006;368(9542):1189-200.
- 494 3. Kerber KJ, de Graft-Johnson JE, Bhutta ZA, *et al.* Continuum of care for maternal, newborn, and  
495 child health: from slogan to service delivery. *Lancet* 2007;370(9595):1358-69.
- 496 4. Yeji F, Shibanuma A, Oduro A, *et al.* Continuum of Care in a Maternal, Newborn and Child  
497 Health Program in Ghana: Low Completion Rate and Multiple Obstacle Factors. *PLoS One*  
498 2015;10(12):e0142849.
- 499 5. World Health Organization (WHO). Standards for improving quality of maternal and newborn  
500 care in health facilities. Geneva: WHO, 2016.
- 501 6. Raven JH, Tolhurst RJ, Tang S, *et al.* What is quality in maternal and neonatal health care?  
502 *Midwifery* 2012;28(5):e676-83.
- 503 7. Donabedian-A. The quality of care: How can it be assessed? *JAMA* 1988;260(12):1743-48.
- 504 8. Heredia-Pi I, Servan-Mori E, Darney BG, *et al.* Measuring the adequacy of antenatal health care:  
505 a national cross-sectional study in Mexico. *Bull World Health Organ* 2016;94(6):452-61.
- 506 9. Kruk ME, Leslie HH, Verguet S, *et al.* Quality of basic maternal care functions in health facilities  
507 of five African countries: an analysis of national health system surveys. *Lancet Glob Health*  
508 2016;4(11):e845-e55.
- 509 10. Kyei NN, Chansa C, Gabrysch S. Quality of antenatal care in Zambia: a national assessment.  
510 *BMC Pregnancy Childbirth* 2012;12:151.



- 1  
2  
3  
4 511 11. Joshi C, Torvaldsen S, Hodgson R, *et al.* Factors associated with the use and quality of antenatal  
5  
6 512 care in Nepal: a population-based study using the demographic and health survey data. *BMC*  
7  
8 513 *Pregnancy Childbirth* 2014;14:94.  
9  
10 514 12. Marchant T, Tilley-Gyado RD, Tessema T, *et al.* Adding content to contacts: measurement of  
11  
12 515 high quality contacts for maternal and newborn health in Ethiopia, north east Nigeria, and Uttar  
13  
14 516 Pradesh, India. *PLoS One* 2015;10(5):e0126840.  
15  
16 517 13. Nesbitt RC, Lohela TJ, Manu A, *et al.* Quality along the continuum: a health facility assessment  
17  
18 518 of intrapartum and postnatal care in Ghana. *PLoS One* 2013;8(11):e81089.  
19  
20 519 14. Azad K, Barnett S, Banerjee B, *et al.* Effect of scaling up women's groups on birth outcomes in  
21  
22 520 three rural districts in Bangladesh: a cluster-randomised controlled trial. *Lancet*  
23  
24 521 2010;375(9721):1193-202.  
25  
26 522 15. Lewycka S, Mwansambo C, Rosato M, *et al.* Effect of women's groups and volunteer peer  
27  
28 523 counselling on rates of mortality, morbidity, and health behaviours in mothers and children in rural  
29  
30 524 Malawi (MaiMwana): a factorial, cluster-randomised controlled trial. *Lancet* 2013;381(9879):1721-  
31  
32 525 35.  
33  
34 526 16. Manandhar DS, Osrin D, Shrestha BP, *et al.* Effect of a participatory intervention with women's  
35  
36 527 groups on birth outcomes in Nepal: cluster-randomised controlled trial. *Lancet*  
37  
38 528 2004;364(9438):970-9.  
39  
40 529 17. WHO. Ghana: WHO statistical profile. 2015. <http://www.who.int/gho/countries/gha.pdf?ua=1>  
41  
42 530 (Accessed 8 July 2018).  
43  
44 531 18. Ghana Statistical Service (GSS), Ghana Health Service (GHS), ICF International.  
45  
46 532 *Ghana Demographic and Health Survey 2014*. Rockville, Maryland: GSS, GHS, and ICF  
47  
48 533 International, 2015.  
49  
50  
51  
52  
53  
54  
55  
56  
57  
58  
59  
60

- 1  
2  
3  
4 534 19. Nyongator FK, Awoonor-Williams JK, Phillips JF, *et al.* The Ghana community-based health  
5  
6 535 planning and services initiative for scaling up service delivery innovation. *Health Policy Plan*  
7  
8 536 2005;20(1):25-34.  
9  
10 537 20. Odeyemi IA, Nixon J. Assessing equity in health care through the national health insurance  
11  
12 538 schemes of Nigeria and Ghana: a review-based comparative analysis. *Int J Equity Health*  
13  
14 539 2013;12:9.  
15  
16 540 21. HERA, Health Partners. Evaluation of the Free maternal health care initiative in Ghana. 2013.  
17  
18 541 [https://www.unicef.org/evaldatabase/files/Ghana\\_130517\\_Final\\_Report.pdf](https://www.unicef.org/evaldatabase/files/Ghana_130517_Final_Report.pdf) (Accessed 8 July  
19  
20 542 2018).  
21  
22  
23 543 22. National Health Insurance Scheme. *Benefits package*. Accra: National Health Insurance  
24  
25 544 Scheme, 2019. <http://www.nhis.gov.gh/benefits.aspx>. (Accessed 20 March 2019).  
26  
27 545 23. Sakeah E, Okawa S, Rexford Oduro A, *et al.* Determinants of attending antenatal care at least  
28  
29 546 four times in rural Ghana: analysis of a cross-sectional survey. *Glob Health Action*  
30  
31 547 2017;10(1):1291879.  
32  
33 548 24. Enuameh YA, Okawa S, Asante KP, *et al.* Factors Influencing Health Facility Delivery in  
34  
35 549 Predominantly Rural Communities across the Three Ecological Zones in Ghana: A Cross-Sectional  
36  
37 550 Study. *PLoS One* 2016;11(3):e0152235.  
38  
39 551 25. Okada K. Japan's new global health policy: 2011-2015. *Lancet* 2010;376(9745):938-40.  
40  
41 552 26. Kikuchi K, Ansah E, Okawa S, *et al.* Ghana's Ensure Mothers and Babies Regular Access to  
42  
43 553 Care (EMBRACE) program: study protocol for a cluster randomized controlled trial. *Trials*  
44  
45 554 2015;16:22.  
46  
47 555 27. Ghana Health Service (GHS). *National safe motherhood service protocol*. Accra: GHS, 2008.  
48  
49 556 28. Gertler PJ, Martinez S, Premand P, *et al.* *Impact evaluation in practice*. 2nd ed. Washington  
50  
51 557 D.C.: World Bank, 2016.  
52  
53  
54  
55  
56  
57  
58  
59  
60

- 1  
2  
3  
4 558 29. StataCorp LP. Stata user's guide release 13. College station, Texas: Stata Press, 2013: 49-54.  
5  
6 559 30. Singal AG, Higgins PD, Waljee AK. A primer on effectiveness and efficacy trials. *Clin Transl*  
7  
8 560 *Gastroenterol* 2014;5:e45.  
9  
10 561 31. Warren C, Mwangi A, Oweya E, *et al.* Safeguarding maternal and newborn health: improving  
11  
12 562 the quality of postnatal care in Kenya. *Int J Qual Health Care* 2010;22(1):24-30.  
13  
14 563 32. Watt C, Abuya T, Warren CE, *et al.* Can reproductive health voucher programs improve quality  
15  
16 564 of postnatal care? A quasi-experimental evaluation of Kenya's safe motherhood voucher scheme.  
17  
18 565 *PLoS One* 2015;10(4):e0122828.  
19  
20 566 33. Kirkwood BR, Manu A, ten Asbroek AH, *et al.* Effect of the Newhints home-visits intervention  
21  
22 567 on neonatal mortality rate and care practices in Ghana: a cluster randomised controlled trial. *Lancet*  
23  
24 568 2013;381(9884):2184-92.  
25  
26 569 34. LeFevre AE, Mohan D, Hutchful D, *et al.* Mobile Technology for Community Health in Ghana:  
27  
28 570 what happens when technical functionality threatens the effectiveness of digital health programs?  
29  
30 571 *BMC Med Inform Decis Mak* 2017;17(1):27.  
31  
32 572 35. Mensah N, Sukums F, Awine T, *et al.* Impact of an electronic clinical decision support system  
33  
34 573 on workflow in antenatal care: the QUALMAT eCDSS in rural health care facilities in Ghana and  
35  
36 574 Tanzania. *Glob Health Action* 2015;8:25756.  
37  
38 575 36. OGBL Solidarité syndicale a.s.b.l. Ghana-Luxembourg Ssocial Trus: Promoting social security  
39  
40 576 through solidarity as an instrument of sustainable development pilot project. 2015.  
41  
42 577 [http://www.ogbl.lu/solidaritesyndicale/files/2015/07/Ghana\\_Brosch\\_EN.pdf](http://www.ogbl.lu/solidaritesyndicale/files/2015/07/Ghana_Brosch_EN.pdf) (Accessed 8 July  
43  
44 578 2018).  
45  
46  
47  
48  
49  
50  
51  
52  
53  
54  
55  
56  
57  
58  
59  
60

1  
2  
3  
4  
5  
6  
7  
8  
9  
10  
11  
12  
13  
14  
15  
16  
17  
18  
19  
20  
21  
22  
23  
24  
25  
26  
27  
28  
29  
30  
31  
32  
33  
34  
35  
36  
37  
38  
39  
40  
41  
42  
43  
44  
45  
46  
47  
48  
49  
50  
51  
52  
53  
54  
55  
56  
57  
58  
59  
60

For peer review only

**Table 1: CONSORT 2010 checklist of information to include when reporting a cluster randomised trial**

| Section/Topic             | Item No | Standard Checklist item                                                                                                                | Extension for cluster designs                                                                   | Page No * |
|---------------------------|---------|----------------------------------------------------------------------------------------------------------------------------------------|-------------------------------------------------------------------------------------------------|-----------|
| <b>Title and abstract</b> |         |                                                                                                                                        |                                                                                                 |           |
|                           | 1a      | Identification as a randomised trial in the title                                                                                      | Identification as a cluster randomised trial in the title                                       | 1         |
|                           | 1b      | Structured summary of trial design, methods, results, and conclusions (for specific guidance see CONSORT for abstracts) <sup>1,2</sup> | See table 2                                                                                     | 3-4       |
| <b>Introduction</b>       |         |                                                                                                                                        |                                                                                                 |           |
| Background and objectives | 2a      | Scientific background and explanation of rationale                                                                                     | Rationale for using a cluster design                                                            | 5-6       |
|                           | 2b      | Specific objectives or hypotheses                                                                                                      | Whether objectives pertain to the cluster level, the individual participant level or both       | 6         |
| <b>Methods</b>            |         |                                                                                                                                        |                                                                                                 |           |
| Trial design              | 3a      | Description of trial design (such as parallel, factorial) including allocation ratio                                                   | Definition of cluster and description of how the design features apply to the clusters          | 6-7       |
|                           | 3b      | Important changes to methods after trial commencement (such as eligibility criteria), with reasons                                     |                                                                                                 | N.A       |
| Participants              | 4a      | Eligibility criteria for participants                                                                                                  | Eligibility criteria for clusters                                                               | 7-9       |
|                           | 4b      | Settings and locations where the data were collected                                                                                   |                                                                                                 | 6-7       |
| Interventions             | 5       | The interventions for each group with sufficient details to allow replication, including how and when they were actually administered  | Whether interventions pertain to the cluster level, the individual participant level or both    | 7-8       |
| Outcomes                  | 6a      | Completely defined pre-specified primary and secondary outcome measures, including how and                                             | Whether outcome measures pertain to the cluster level, the individual participant level or both | 9-10      |

|                                  |     |                                                                                                                                                                                             |                                                                                                                                                                                                                    |     |
|----------------------------------|-----|---------------------------------------------------------------------------------------------------------------------------------------------------------------------------------------------|--------------------------------------------------------------------------------------------------------------------------------------------------------------------------------------------------------------------|-----|
|                                  |     | when they were assessed                                                                                                                                                                     |                                                                                                                                                                                                                    |     |
|                                  | 6b  | Any changes to trial outcomes after the trial commenced, with reasons                                                                                                                       |                                                                                                                                                                                                                    | 6   |
| Sample size                      | 7a  | How sample size was determined                                                                                                                                                              | Method of calculation, number of clusters(s) (and whether equal or unequal cluster sizes are assumed), cluster size, a coefficient of intracluster correlation (ICC or $k$ ), and an indication of its uncertainty | 9   |
|                                  | 7b  | When applicable, explanation of any interim analyses and stopping guidelines                                                                                                                |                                                                                                                                                                                                                    | NA  |
| Randomisation:                   |     |                                                                                                                                                                                             |                                                                                                                                                                                                                    |     |
| Sequence generation              | 8a  | Method used to generate the random allocation sequence                                                                                                                                      |                                                                                                                                                                                                                    | 7   |
|                                  | 8b  | Type of randomisation; details of any restriction (such as blocking and block size)                                                                                                         | Details of stratification or matching if used                                                                                                                                                                      | 7   |
| Allocation concealment mechanism | 9   | Mechanism used to implement the random allocation sequence (such as sequentially numbered containers), describing any steps taken to conceal the sequence until interventions were assigned | Specification that allocation was based on clusters rather than individuals and whether allocation concealment (if any) was at the cluster level, the individual participant level or both                         | 7   |
| Implementation                   | 10  | Who generated the random allocation sequence, who enrolled participants, and who assigned participants to interventions                                                                     | Replace by 10a, 10b and 10c                                                                                                                                                                                        | 7,8 |
|                                  | 10a |                                                                                                                                                                                             | Who generated the random allocation sequence, who enrolled clusters, and who assigned clusters to interventions                                                                                                    | 7,8 |
|                                  | 10b |                                                                                                                                                                                             | Mechanism by which individual participants were included in clusters for the purposes of the trial (such as complete                                                                                               | 7,8 |

|                                                      |     |                                                                                                                                                |                                                                                                                                                                     |       |
|------------------------------------------------------|-----|------------------------------------------------------------------------------------------------------------------------------------------------|---------------------------------------------------------------------------------------------------------------------------------------------------------------------|-------|
|                                                      |     | enumeration, random sampling)                                                                                                                  |                                                                                                                                                                     |       |
|                                                      | 10c |                                                                                                                                                | From whom consent was sought (representatives of the cluster, or individual cluster members, or both), and whether consent was sought before or after randomisation | 14    |
| Blinding                                             | 11a | If done, who was blinded after assignment to interventions (for example, participants, care providers, those assessing outcomes) and how       |                                                                                                                                                                     | 7,9   |
|                                                      | 11b | If relevant, description of the similarity of interventions                                                                                    |                                                                                                                                                                     | NA    |
| Statistical methods                                  | 12a | Statistical methods used to compare groups for primary and secondary outcomes                                                                  | How clustering was taken into account                                                                                                                               | 12-13 |
|                                                      | 12b | Methods for additional analyses, such as subgroup analyses and adjusted analyses                                                               |                                                                                                                                                                     | 13    |
| Results                                              |     |                                                                                                                                                |                                                                                                                                                                     |       |
| Participant flow (a diagram is strongly recommended) | 13a | For each group, the numbers of participants who were randomly assigned, received intended treatment, and were analysed for the primary outcome | For each group, the numbers of clusters that were randomly assigned, received intended treatment, and were analysed for the primary outcome                         | 14    |
|                                                      | 13b | For each group, losses and exclusions after randomisation, together with reasons                                                               | For each group, losses and exclusions for both clusters and individual cluster members                                                                              | 14    |
| Recruitment                                          | 14a | Dates defining the periods of recruitment and follow-up                                                                                        |                                                                                                                                                                     | 8     |
|                                                      | 14b | Why the trial ended or was stopped                                                                                                             |                                                                                                                                                                     | 8     |
| Baseline data                                        | 15  | A table showing baseline demographic and clinical                                                                                              | Baseline characteristics for the individual and cluster levels as                                                                                                   | 14-15 |

|                         |     | characteristics for each group                                                                                                                    | applicable for each group                                                                                                                  |           |
|-------------------------|-----|---------------------------------------------------------------------------------------------------------------------------------------------------|--------------------------------------------------------------------------------------------------------------------------------------------|-----------|
| Numbers analysed        | 16  | For each group, number of participants (denominator) included in each analysis and whether the analysis was by original assigned groups           | For each group, number of clusters included in each analysis                                                                               | 14, 17-21 |
| Outcomes and estimation | 17a | For each primary and secondary outcome, results for each group, and the estimated effect size and its precision (such as 95% confidence interval) | Results at the individual or cluster level as applicable and a coefficient of intracluster correlation (ICC or k) for each primary outcome | 15-19     |
|                         | 17b | For binary outcomes, presentation of both absolute and relative effect sizes is recommended                                                       |                                                                                                                                            | NA        |
| Ancillary analyses      | 18  | Results of any other analyses performed, including subgroup analyses and adjusted analyses, distinguishing pre-specified from exploratory         |                                                                                                                                            | 20-22     |
| Harms                   | 19  | All important harms or unintended effects in each group (for specific guidance see CONSORT for harms <sup>3</sup> )                               |                                                                                                                                            | 8         |
| Discussion              |     |                                                                                                                                                   |                                                                                                                                            |           |
| Limitations             | 20  | Trial limitations, addressing sources of potential bias, imprecision, and, if relevant, multiplicity of analyses                                  |                                                                                                                                            | 24        |
| Generalisability        | 21  | Generalisability (external validity, applicability) of the trial findings                                                                         | Generalisability to clusters and/or individual participants (as relevant)                                                                  | 22-24     |
| Interpretation          | 22  | Interpretation consistent with results, balancing benefits and harms, and considering other relevant evidence                                     |                                                                                                                                            | 22-24     |
| Other information       |     |                                                                                                                                                   |                                                                                                                                            |           |
| Registration            | 23  | Registration number and                                                                                                                           |                                                                                                                                            | 4,6       |



1  
2  
3  
4  
5  
6  
7  
8  
9  
10  
11  
12  
13  
14  
15  
16  
17  
18  
19  
20  
21  
22  
23  
24  
25  
26  
27  
28  
29  
30  
31  
32  
33  
34  
35  
36  
37  
38  
39  
40  
41  
42  
43  
44  
45  
46  
47  
48  
49  
50  
51  
52  
53  
54  
55  
56  
57  
58  
59  
60

| name of trial registry |    |                                                                                 |                                                                                                                                                                                                     |
|------------------------|----|---------------------------------------------------------------------------------|-----------------------------------------------------------------------------------------------------------------------------------------------------------------------------------------------------|
| Protocol               | 24 | Where the full trial protocol can be accessed, if available                     | Kikuchi K, Ansah E, Okawa S, et al. Ghana's Ensure Mothers and Babies Regular Access to Care (EMBRACE) program: study protocol for a cluster randomized controlled trial. <i>Trials</i> 2015;16:22. |
| Funding                | 25 | Sources of funding and other support (such as supply of drugs), role of funders | 25                                                                                                                                                                                                  |

\* Note: page numbers optional depending on journal requirements

Peer review only

**Table 2: Extension of CONSORT for abstracts<sup>1,2</sup> to reports of cluster randomised trials**

| Item                      | Standard Checklist item                                                                                     | Extension for cluster trials                                                                                   |
|---------------------------|-------------------------------------------------------------------------------------------------------------|----------------------------------------------------------------------------------------------------------------|
| <b>Title</b>              | Identification of study as randomised                                                                       | <b>Identification of study as cluster randomised</b>                                                           |
| <b>Trial design</b>       | Description of the trial design (e.g. parallel, cluster, non-inferiority)                                   |                                                                                                                |
| <b>Methods</b>            |                                                                                                             |                                                                                                                |
| <b>Participants</b>       | Eligibility criteria for participants and the settings where the data were collected                        | <b>Eligibility criteria for clusters</b>                                                                       |
| <b>Interventions</b>      | Interventions intended for each group                                                                       |                                                                                                                |
| <b>Objective</b>          | Specific objective or hypothesis                                                                            | <b>Whether objective or hypothesis pertains to the cluster level, the individual participant level or both</b> |
| <b>Outcome</b>            | Clearly defined primary outcome for this report                                                             | <b>Whether the primary outcome pertains to the cluster level, the individual participant level or both</b>     |
| <b>Randomization</b>      | How participants were allocated to interventions                                                            | <b>How clusters were allocated to interventions</b>                                                            |
| <b>Blinding (masking)</b> | Whether or not participants, care givers, and those assessing the outcomes were blinded to group assignment |                                                                                                                |
| <b>Results</b>            |                                                                                                             |                                                                                                                |
| <b>Numbers randomized</b> | Number of participants randomized to each group                                                             | <b>Number of clusters randomized to each group</b>                                                             |
| <b>Recruitment</b>        | Trial status <sup>1</sup>                                                                                   |                                                                                                                |
| <b>Numbers analysed</b>   | Number of participants analysed in each group                                                               | <b>Number of clusters analysed in each group</b>                                                               |
| <b>Outcome</b>            | For the primary outcome, a result for each group and the estimated effect size and its precision            | <b>Results at the cluster or individual participant level as applicable for each primary outcome</b>           |
| <b>Harms</b>              | Important adverse events or side effects                                                                    |                                                                                                                |
| <b>Conclusions</b>        | General interpretation of the results                                                                       |                                                                                                                |
| <b>Trial registration</b> | Registration number and name of trial register                                                              |                                                                                                                |
| <b>Funding</b>            | Source of funding                                                                                           |                                                                                                                |

<sup>1</sup> Relevant to Conference Abstracts

## REFERENCES

---

- 1 Hopewell S, Clarke M, Moher D, Wager E, Middleton P, Altman DG, et al. CONSORT for reporting randomised trials in journal and conference abstracts. *Lancet* 2008, 371:281-283
- 2 Hopewell S, Clarke M, Moher D, Wager E, Middleton P, Altman DG at al (2008) CONSORT for reporting randomized controlled trials in journal and conference abstracts: explanation and elaboration. *PLoS Med* 5(1): e20
- 3 Ioannidis JP, Evans SJ, Gotzsche PC, O'Neill RT, Altman DG, Schulz K, Moher D. Better reporting of harms in randomized trials: an extension of the CONSORT statement. *Ann Intern Med* 2004; 141(10):781-788.

For peer review only
